1 kSHREC 'Delta' reflects the shape of kinetochore rather than

2 intrakinetochore tension

3

4 Fioranna Renda<sup>1</sup>, Valentin Magidson<sup>1,2</sup>, Irina Tikhonenko<sup>1</sup>, Christopher Miles<sup>3</sup>, Alex Mogilner<sup>3</sup>,  
5 and Alexey Khodjakov<sup>1,4,\*</sup>

6

7 <sup>1</sup>Wadsworth Center, New York State Department of Health, Albany, NY, USA

8 <sup>2</sup>Current address: National Cancer Institute, Frederick, MD, USA

9 <sup>3</sup>Courant Institute and Department of Biology, New York University, New York, NY, USA

10 <sup>4</sup>Rensselaer Polytechnic Institute, Troy, NY, USA

11

12 \* Correspondence: Alexey Khodjakov, PO Box 509, Albany, NY 12201-0509

13 E-mail: alexey.khodjakov@health.ny.gov; voice: +1 (518) 486-5339

14 **Abstract**

15 Distance between fluorescent spots formed by various kinetochore proteins ('Delta') is proposed  
16 to reflect the level of intrakinetochore tension (IKT). However, larger-scale changes in the  
17 kinetochore architecture may also affect Delta. To test this possibility, we measure Delta in long  
18 kinetochores of Indian muntjac (IM) whose shape, size, and orientation are discernable in  
19 conventional light microscopy. We find that architecture of IM kinetochores and the value of  
20 Delta change minimally when microtubule-mediated forces are suppressed by Taxol. In  
21 contrast, large decreases of Delta observed in Taxol-treated human cells coincide with  
22 prominent changes in length and shape of the kinetochore. We also find that inner and outer  
23 kinetochore proteins intermix within a common spatial compartment instead of forming separate  
24 thin layers. These observations, supported by computational modelling, suggest that changes in  
25 Delta reflect changes in the kinetochore shape rather than the level of IKT.

## 26 **Introduction**

27 Segregation of chromosomes during cell division (mitosis) depends upon ‘kinetochores’,  
28 macromolecular assemblies located at the centromere of each chromosome. Kinetochores  
29 perform two principal functions: they generate the force that propels chromosomes and produce  
30 a checkpoint signal that delays progression through mitosis until all chromosomes attach to  
31 spindle microtubules. Molecular composition of the kinetochore is complex, comprising over a  
32 hundred of various proteins [1]. Further, as the cell progresses through mitosis, molecular  
33 composition of the kinetochore and its architecture change in response to various types of  
34 interactions with spindle microtubules. These adaptive changes in size and shape of the  
35 kinetochores ensure that microtubule attachments form rapidly yet with a low number of errors  
36 [2, 3]. Thus, revealing mechanisms that govern kinetochore architecture is of a significant  
37 interest.

38         Due to its small size in most mammalian cells (~300 nm), the shape of the kinetochore  
39 or the distribution of its components cannot be directly delineated in conventional light  
40 microscopy (LM). A popular approach to overcoming this limitation is based on measuring the  
41 ‘Delta’, a distance between centroids of fluorescent spots formed by various proteins, visualized  
42 in different colors within the same kinetochore. Measurements of Delta lay the foundation of a  
43 nanometer-scale map that attributes various proteins to thin layers orthogonal to the inner-outer  
44 (from the centromere towards attached microtubules) axis of the kinetochore [4, 5]. Delta  
45 between the proteins at the base of the kinetochore (CenpA) and those in the microtubule  
46 binding domain (Hec1) has been shown to decrease ~30% when microtubule dynamics are  
47 suppressed by Taxol [4, 6]. The decrease was interpreted as a manifestation of changes in the  
48 physical separation between the inner and outer layers, which in turn led to the concept of ‘intra-  
49 kinetochore tension’ and the notion that stretching the kinetochore is necessary for the  
50 satisfaction of the spindle assembly checkpoint (SAC) [7]. This attractive hypothesis; however,  
51 remains debatable for two main reasons. First, there exists a high degree of variability in Delta

52 measurements conducted via different techniques and in different laboratories. While some  
53 report that Delta (CenpA-Hec1) decreases by ~30 nm when human cells are treated with Taxol  
54 [4], others observe a lesser decrease [8] or no statistically significant change in separation of  
55 the same kinetochore proteins under similar experimental conditions [9, 10]. These  
56 discrepancies likely arise from the alternative measuring techniques, particularly various  
57 approaches to compensating chromatic aberration, inevitable in LM [4, 5, 8, 10, 11]. Second,  
58 interpretation of Delta as a metric for physical distances between molecules is obfuscated by  
59 the malleable shape of the kinetochore. While literal interpretation of Delta is proven for 'single-  
60 molecule high-resolution colocalization' (SHREC) analyses of individual molecules [12, 13],  
61 applicability of this approach to the kinetochore (SHREC on kinetochores, kSHREC [4]) was  
62 originally justified by the layered-disc appearance of kinetochores in Electron Microscopy (EM)  
63 [14]. More recent observations of significant alterations in the size and shape of the kinetochore  
64 in response to various types of interactions with microtubules [2, 3, 15, 16] challenge this  
65 justification [8]. The ongoing debate on the importance of intrakinetochore tension (IKT)  
66 prompted us to evaluate relative contributions of distances between kinetochore layers vs.  
67 changes in shape and orientation of the kinetochores on the centromere towards the value of  
68 Delta. To this end, we applied kSHREC analysis to the compound kinetochores of Indian  
69 muntjac (IM) that formed by a lateral fusion of typical mammalian centromeres during evolution  
70 of this species. IM kinetochores comprise the conventional thin trilaminar plate (75 nm);  
71 however, the length of the plate exceeds 1.5  $\mu\text{m}$  instead of ~0.3  $\mu\text{m}$  observed in most  
72 mammalian cells. The increased length makes the shape and orientation of the kinetochore  
73 discernable in LM. Comparative kSHREC analyses in IM vs. human cells suggest that the  
74 decrease of Delta observed in Taxol-treated human cells primarily reflects changes in the length  
75 of curved kinetochore plates rather than the level of IKT. This prompts re-evaluation of the role  
76 ascribed to IKT in the control of mitotic progression.

## 77 **Results**

### 78 **Advantages of Indian muntjac kinetochores for kSHREC analysis**

79 The low number of chromosomes in Indian muntjac (IM) arose from the tandem fusion of  
80 numerous normally-sized chromosomes during evolution of this species [17]. As a result, each  
81 IM kinetochore comprises tandem repeats of the conventional mammalian kinetochores [18].  
82 While typical mammalian kinetochores appear as small spots in conventional fluorescence LM  
83 (Figure 1A,A'), IM kinetochores form thin lines with the length greater than 1  $\mu\text{m}$  (Figure 1B,B').  
84 Molecular composition of IM kinetochores is similar to that of conventional kinetochores [19] and  
85 major kinetochore components can be visualized in both via expression of fluorescently-labeled  
86 proteins or antibody staining with similar efficiency (Figure 1A,B). At the EM level, IM  
87 kinetochores display the typical trilaminar plate with the widths of the layers similar to that  
88 observed in other mammalian cells [14, 20, 21]. However, IM plates are several fold longer than  
89 the 250-300 nm plates observed in human cells (Figure 1C,D).

90 Because orientation of sister kinetochores is discernable in IM, intensity profiles can be  
91 generated by scanning a line orthogonal to the plates (Figure 1B'). Fitting these profiles with  
92 Gaussian functions determines positions of the fluorescent peaks with nanometer precision  
93 (Figure 1E) and the distance between the green and red peaks within a kinetochore (i.e.,  $\Delta$ )  
94 is then calculated as shown in Figure 1E. Pairwise calculation of  $\Delta$  for sister kinetochores  
95 negates chromatic aberration [4]. Further, accuracy of this approach is not affected by large  
96 standard deviations in the distribution of experimental values [8] that have been shown to  
97 erroneously increase mean values obtained by measurements of  $\Delta$  independently for each  
98 kinetochore [5, 8]. A major limitation of the pairwise  $\Delta$  measurement in human cells, is that  
99 this approach underestimates the value of  $\Delta$  if sister kinetochores swivel around the  
100 centromere so that their outer layers do not face in opposite directions [4, 8]. However, because  
101 the plates of IM kinetochores are discernable in LM, this limitation is overcome by selecting

102 sister kinetochores with the precisely opposite orientation. Thus, Delta in IM can be measured  
103 with the level of precision not achievable in kSHREC analyses of smaller human kinetochores  
104 whose orientation cannot be accurately determined.

### 105 **Delta (CenpA-Hec1) changes minimally in IM cells treated with Taxol**

106 We focus our analyses on the separation between the outer kinetochore protein Hec1 and the  
107 centromere-specific histone CenpA that forms the base of the kinetochore. To facilitate direct  
108 comparison of the results, the antibodies against Hec1 (9G3, Abcam) and CenpA (3-19, Abcam)  
109 are the same as in previous Delta measurements in human cells [4, 5, 8]. We find that  
110  $\Delta_{\text{CenpA-Hec1}}$  in untreated IM metaphase ( $95 \pm 14$  nm, Figure 2A) is similar to that previously  
111 reported in human metaphase ( $\sim 90$  nm [5, 8]). Brief exposure to Taxol decreases  $\Delta_{\text{CenpA-Hec1}}$   
112 to  $87 \pm 14$  nm in IM (Figure 2A). This decrease is statistically significant ( $p = 0.0006$  in 2-tailed  
113 Student's t-test); however, it is considerably smaller than  $\sim 20$  nm decrease in human cells [5, 8,  
114 22].

115 Immunolocalization of endogenous CenpA requires partial denaturation of the sample  
116 because this protein is buried inside the DNA and thus is not accessible to the antibodies when  
117 ultrastructure of the kinetochore is intact. Consequentially, under conditions required for  
118 immunolocalization of CenpA, neither microtubules nor the trilaminar appearance of kinetochore  
119 plates are preserved as evidenced in EM [23, 24]. To minimize potential effects of sample  
120 denaturation we analyze Delta in IM cells that constitutively express CenpA-GFP. Fluorescence  
121 of this protein is preserved when cells are fixed with 3.2% PFA (Figure 1B) or 1% GA (Figure  
122 2B, B'), which is important as fluorescent spots containing outer-kinetochore proteins are  
123 enlarged in human cells fixed with paraformaldehyde (PFA) vs. glutaraldehyde (GA) [8]. This  
124 difference indicates differences in preservation of kinetochore morphology after GA vs. PFA  
125 fixation.

126 We find that  $\Delta_{\text{CenpA-GFP-Hec1}}$  in IM cells fixed with PFA ( $113 \pm 14$  nm, Figure 2C) or GA  
127 ( $109 \pm 14$  nm, Figure 2D) is greater than  $\Delta_{\text{CenpA-Hec1}}$  ( $95 \pm 14$  nm, Figure 2A). A similar  
128 difference in the distance between Hec1 and CenpA vs. CenpA-GFP positions was observed in  
129 human cells [8, 22] and the difference was attributed to the increased fluorescence between the  
130 sister kinetochores due to overexpression of CenpA [22]. In contrast to human cells, where  
131 Taxol decreases  $\Delta_{\text{CenpA-GFP-Hec1}}$  by greater than 20 nm, in IM the value decreases merely 5-7  
132 nm despite a prominent decrease in the distance between sister kinetochores, which indicates  
133 cessation of forces that stretch the centromere (Figure 2C,D). Indeed, inter-kinetochore  
134 distances in cells treated with Taxol are similar to the distances in cells where microtubules are  
135 completely depolymerized (Figure 2C,D). However, in contrast to Taxol,  $\Delta_{\text{CenpA-GFP-Hec1}}$   
136 decreases by  $\sim 20$ -nm after 15-min exposure of IM cells to 3- $\mu$ M nocodazole decreases (Figure  
137 2C,D).

138 Despite minimal changes of Delta, physiological response of IM to Taxol is similar to that  
139 in human cells (Figure 2 – Figure supplement 1). In both cell types, 15-min after addition of 10-  
140  $\mu$ M Taxol, density of spindle microtubules increases prominently near the spindle poles and  
141 decreases near the equator (Figure 2 – Figure supplements 1,2,3). During prolonged exposure  
142 to the drug, both human and IM cells continue to enter mitosis but remain arrested for longer  
143 than 20 hours (Figure 2 – Figure supplement 1; Videos 1 and 2). This behavior indicates that IM  
144 cells possess a stringent SAC that is not satisfied despite the minimal decrease of Delta. Thus,  
145 our observations are inconsistent with the proposed role of IKT in the control of mitotic  
146 progression and/or with the notion that Delta is a reliable metrics for IKT.

#### 147 **'Inner' and 'outer' proteins spatially overlap within IM kinetochores**

148 Morphologically, kinetochores appear as  $\sim 75$  nm trilaminar plates in GA-fixed plastic-embedded  
149 EM preparations (Figure 1C,D). However, immuno-localization analyses are not consistent with  
150 the idea that kinetochore proteins form thin layers within the plate. Correlative immuno-

151 LM/immuno-EM analyses suggest that Hec1 molecules are spread in the direction of the  
152 attached microtubules for greater than 200 nm in human cells [8]. A unique advantage of IM  
153 kinetochore is that the width of the spatial domains occupied by various kinetochore proteins  
154 can be directly measured as the Full Width at Half Maximum (FWHM) of the fluorescence peak  
155 in line scans orthogonal to the orientation of the plate (Figure 3A,B).

156 We find that FWHM of the Hec1 distribution within IM kinetochores during metaphase is  
157  $233\pm 20$  nm after GA fixation and  $225\pm 22$  nm after PFA fixation (Figure 3C). These values are  
158 significantly larger than FWHM of line scans across individual microtubules ( $170\pm 7$  nm after GA  
159 and  $189\pm 13$  nm after PFA, Figure 3C), visualized with the same fluorophore and under identical  
160 optical conditions. EM firmly establishes that the diameter of a microtubule in GA-fixed cells is  
161  $\sim 25$  nm [25], which implies that FWHM of line scans across a microtubule is determined by the  
162 diffraction-limited resolution of the optical system. Thus, the width of Hec1 distribution that  
163 exceeds FWHM of diffraction-limited profile by 63 nm, reflects the true physical width of the  
164 layer occupied by Hec1 within the kinetochore. Importantly, FWHM values are significantly more  
165 variable among Hec1 than among microtubule profiles (Figure 3C). This increased variability  
166 supports the notion that the width of microtubule profiles is determined by the optics while the  
167 Hec1 profiles reflect natural fluctuations in the organization of the kinetochore plate. We also  
168 notice that the width of microtubule profiles in PFA-fixed samples is greater than after GA  
169 fixation. This increase likely reflects disintegration of microtubule structure that results in spatial  
170 redistribution of tubulin. Indeed, microtubules are not structurally detectable in EM on PFA-fixed  
171 samples [25, 26].

172 Measurements in metaphase cells treated with Taxol demonstrate that abrogation of  
173 centromere tension increases FWHM of Hec1 to  $251\pm 27$  nm after GA and  $241\pm 30$  nm after PFA  
174 fixation. Complete depolymerization of microtubules with high concentration of nocodazole  
175 results in a more prominent increase of Hec1 FWHM to  $278\pm 35$  nm (GA) and  $273\pm 39$  nm (PFA)  
176 (Figure 3C).



177           CenpA-GFP also localizes within a layer of measurable width. Because resolution is  
178 proportional to the wavelength, FWHM is less for a diffraction-limited peak formed by a green  
179 vs. red fluorophore. On the microscope used in this study, FWHM of microtubules visualized  
180 with a green fluorophore (GFP or Alexa488) is  $155\pm 6$  nm after GA and  $172\pm 11$  nm after PFA  
181 fixation (Figure 3C). FWHM of CenpA-GFP peaks is significantly wider, measuring  $208\pm 18$  nm  
182 after GA fixation and  $202\pm 19$  nm after PFA. The width of CenpA-GFP layer increases slightly to  
183  $216\pm 24$  nm (GA) and  $210\pm 26$  nm (PFA) in Taxol-treated cells, and further increases to  $224\pm 24$   
184 nm (GA) and  $222\pm 30$  nm (PFA) when microtubules are completely depolymerized with  
185 nocodazole (Figure 3C).

186           FWHM measurements demonstrate that both inner (CenpA) and outer (Hec1)  
187 kinetochore components reside within layers whose widths are significantly larger than the  
188 diffraction limit of resolution and therefore the widths of these layers are measurable in LM.  
189 Further, CenpA and Hec1 layers are approximately twofold larger than the distance between the  
190 centers of the layers occupied by these proteins (i.e., Delta). These dimensions imply that  
191 approximately half of CenpA and Hec1 molecules are spatially intermixed within the same  
192 compartment, which in turn means that Delta does not accurately reflect the typical distance  
193 between molecules within IM kinetochores.

#### 194 **CenpA and Hec1 spatially overlap within kinetochores in human cells.**

195           Our observation that the width of the layers formed by inner and outer proteins within  
196 compound kinetochores of IM exceeds 200 nm raises a question of whether a similar  
197 architecture exists in human kinetochores. The underlying assumption in Delta measurements is  
198 that kinetochore proteins form negligibly thin layers within an ~300-nm long plate [4]. A corollary  
199 of this assumption is that FWHM of the kinetochore spots in LM should reflect the length of the  
200 plate in one direction and be diffraction limited in the orthogonal direction.

201 To explore whether fluorescently labeled kinetochores in human cells resemble the  
202 shape and dimensions assumed in kSHREC analyses, we constructed a computational  
203 simulation in which the inner and outer kinetochore layers are modeled as a specified number of  
204 'molecules' (points) randomly distributed within a 3-D volume of specified shape. This  
205 distribution of molecules is convolved (blurred) with a 3-D Gaussian filter which mimics the point  
206 spread function (PSF) of a light microscope. The blurred image is then scaled down to match  
207 dimensions of voxels in a typical LM volume recorded on a CCD camera at specified Z-steps.  
208 Fitting a Gaussian function to these simulated 3-D images of kinetochores is then used to  
209 determine coordinates and FWHM of the peaks (Figure 4A).

210 To establish PSF parameters, we recorded 3-D volumes of multi-color 100-nm  
211 fluorescent beads under the same optical conditions as kinetochores (Figure 4B).  
212 Measurements of the beads yield  $155 \pm 27$  nm ( $n = 245$ ) FWHM in the green and  $172 \pm 31$  nm ( $n =$   
213  $125$ ) in the red channels. These FWHM values are indistinguishable from FWHM of individual  
214 microtubules determined by orthogonal line-scans in GA-fixed samples (Figure 3C) as expected  
215 for measurements of diffraction-limited objects on the same microscope. With the  
216 experimentally measured PSF parameters, the model predicts that kinetochores comprising  
217 inner and outer layers with diffraction-limited widths and separated by  $\Delta$  previously observed  
218 in RPE1 cells [8] should appear as drastically elongated fluorescent spots with minimal overlap  
219 between the layers (Figure 4C). In contrast to this prediction, kinetochores appear as more  
220 rounded and FWHM of both red and green spots is significantly larger than the diffraction limit,  
221 which indicates a noticeable overlap between the inner and outer domains (Figure 4D – Figure  
222 supplement 1, also see [8]). This appearance implies that the width of kinetochore layers is  
223 similar to the length of the plate. Indeed, computational modelling predicts that for  $\sim 300$  long  
224 kinetochore plates the width of both inner and outer layers need to be  $\sim 250$  nm to match the  
225 typical appearance of human kinetochores (Figure 4E). This value is similar to the widths of  
226 kinetochore layers measured in the compound IM kinetochores (Figure 3C).

227 Another feature inconsistent with the notion that proteins form relatively thin layers in  
228 human kinetochores is the orientation of the longer axis, particularly for the outer kinetochore  
229 components (Hec1, Figure 4 – Figure supplement 1). If these proteins are restricted to a  
230 relatively thin but long plate, the longer axis of fluorescent spots formed by these proteins is  
231 expected to orient perpendicular to the attached microtubule bundle. In contrast, Hec1 spots are  
232 elongated in various directions within the same cell (Figure 4 – Figure supplement 1, Video 3).  
233 Variability in the orientation of the longer axes becomes even more prominent in cells treated  
234 with Taxol (Figure 4 – Figure supplement 2, Video 4). This change suggests that Taxol alters  
235 dimensions and/or shape of the kinetochore, which may affect the value of Delta.

### 236 **Kinetochore plates are curved, and the length of plate increases in Taxol treated human** 237 **cells**

238 Canonical interpretation of Delta as metrics for the distance between layers of molecules  
239 assumes that the overall shape and dimensions of the kinetochore plate remain constant.  
240 Previous computational analyses suggest that for inflexible layers Delta accurately reflects the  
241 distance even if the layers are slanted or jagged [4]. However, for curved layers, the value of  
242 Delta is smaller than the physical distance between the layers and the magnitude of this  
243 difference is greater for curvatures with smaller radii and/or longer plates (Figure 5A, also see  
244 reference [8]). Systematic analysis of the kinetochore plate length and curvature in EM  
245 preparations has not been reported, which prompted us to assess these parameters in serial  
246 70-nm plastic sections of untreated (Figure 5 – Figure supplement 1) vs. Taxol-treated (Figure 5  
247 – Figure supplement 2) RPE1 cells.

248 Tracing kinetochore plates in GA-fixed conventionally embedded cells (Figure 5B)  
249 demonstrates that the length measured in sections oriented parallel to the coverslip surface is  
250  $283 \pm 54$  nm (N = 87) during metaphase but it increases to  $410 \pm 84$  (N = 38) when metaphase

251 cells are treated with Taxol for 15 min (Figure 5C). Both values are significantly greater than  
252 FWHM of Hec1 spots measured in LM (Figure 4 – Figure supplements 1,2).

253 The shape of outer kinetochore plate is highly variable both in untreated and Taxol-  
254 treated cells (Figure 5 – Figure supplements 1,2). Undulations, protrusions, and cavitations are  
255 prominent in most kinetochores. To estimate a typical curvature of the plate we determined  
256 dimensions of the minimal rectangular box that fully encompasses the plate in a single section  
257 (Figure 5B'). This approach yields more uniform results than direct fitting of the plate with a  
258 circular arc. The latter produces large residual errors due to minute irregularities in the shape of  
259 the plate, particularly when the plate is short (our unpublished observation). We find that a  
260 typical outer kinetochore plate in untreated cells is encompassed by a  $270\pm 47$ -nm by  $61\pm 18$ -nm  
261 rectangle while Taxol-treated kinetochores require a  $350\pm 57$ -nm by  $110\pm 39$ -nm bounding box  
262 (Figure 5D). Assuming a perfectly circular arc, these dimensions suggest that typical  
263 kinetochore curvatures are  $\sim 180$  nm for the untreated and  $\sim 194$  nm for Taxol-treated cells  
264 (Figure 5D). The difference between these values is not statistically significant.

265 Thus, EM analyses suggest that a typical kinetochore plate is an arc with the curvature  
266 radius of  $\sim 190$  nm. Taxol does not significantly change the curvature, but it prominently  
267 increases the length of the plate. To more clearly understand how these geometric features of  
268 the kinetochore plate influence the results of FWHM analyses, we employed a computational  
269 model. The model makes two major predictions. First, to achieve  $\sim 145$ -nm Delta observed in  
270 untreated RPE1 cells, kinetochore layers need to be separated by  $\sim 155$  nm (Figure 5E).  
271 Second, elongation of the plate with fixed curvature leads to a decrease in Delta from 145 nm to  
272 125 nm (Figure 5F). The model also predicts LM appearance of kinetochore spots that  
273 resembles appearance of real kinetochores in untreated and Taxol-treated RPE1 cells (Figure  
274 5E,F, Figure 4 – Figure supplement 1,2).

## 275 Discussion

276 Pioneering time-lapse recordings of live cells with kinetochores labeled in two different  
277 colors revealed that the distance between fluorescent spots corresponding to the microtubule-  
278 binding domain and the base of kinetochore was not constant. Specifically, the spots appeared  
279 to be closer together when microtubule dynamics were suppressed with Taxol, a treatment  
280 known to reduce the force that stretches centromeres of bioriented chromosomes [6, 27]. These  
281 observations gave birth to the concept of IKT [7]. Subsequent pairwise measurements of  
282 distances between the spots formed by various kinetochore proteins (i.e., Delta) laid the  
283 foundation of a linear map that ascribed various proteins to specific layers within the kinetochore  
284 and interpreted Delta as the distance that separates these layers [4]. Essential for this  
285 interpretation of Delta was the assumption that kinetochores are flat thin plates whose shape  
286 and dimensions remain constant upon Taxol treatment. Here we test this assumption and find  
287 that a typical kinetochore plate in human cells is curved, which implies that Delta  
288 underestimates the distance between the layers. We also find that the length of curved  
289 kinetochore plates increases in Taxol-treated cells. This type of architectural reorganization  
290 inevitably decreases the value of Delta even if the distance separating inner and outer  
291 kinetochore layers remains constant. Thus, our data demonstrate that Delta is not directly  
292 proportional to IKT.

293 Our observation of a significant plate curvature is consistent with early EM descriptions  
294 of kinetochores as crescents with the convex side facing away from the centromere [reviewed in  
295 28]. Indeed, kinetochore plates in human cells cannot be truly flat because they protrude from  
296 the surface of a cylindrical centromere, whose relaxed radius is less than 400 nm. A force  
297 pulling kinetochores outwards is expected to increase the plate's curvature and our EM results  
298 suggest that the typical radius of kinetochore plates visualized via conventional EM is less than  
299 200 nm (Figure 5). At this curvature Delta would underestimate the distance between negligibly  
300 thin layers by ~20% (Fig5A). However, our data suggest that kinetochore layers are not

301 negligibly thin, and the widths of the layers are not constant – they increase under conditions  
302 that decrease Delta (Figure 3, also see [8]). These complex architectural changes further  
303 complicate quantitative interpretation of Delta.

304 FWHM measurements of Hec1 and CenpA spots in human cells also suggest a  
305 significant spatial overlap between the inner and outer proteins. Our data demonstrate that  
306 human kinetochores are much larger than diffraction-limited spots in all directions, i.e., the width  
307 of the kinetochore is as large as its length. This observation is supported by computational  
308 simulations with experimentally-determined parameters of PSF. These simulations predict that  
309 fluorescent spots produced by protein layers constrained within flat thin discs do not resemble  
310 appearance and dimensions of kinetochore spots observed in human cells (Figure 5E, Figure 4  
311 – Figure supplement 1, 2). Thus, ‘inner’ and ‘outer’ proteins are not separated by a typical  
312 distance represented by Delta but intermixed within a common spatial compartment.

313 Consistent with the notion that large-scale architectural reorganizations contribute  
314 significantly towards the value of Delta in human cells, we observe that Delta remains virtually  
315 constant in Taxol-treated IM cells. Due to the increased length of the kinetochore as well as a  
316 larger diameter of centromere in IM, kinetochore plates in these cells are relatively flat (Figure 2  
317 – Figure supplement 2) and their shape is largely preserved in Taxol-treated cells (Figure 2 –  
318 Figure supplement 3). These features ensure that Delta values determined in line-scans  
319 orthogonal to the plate accurately reflect the distance between the inner and outer kinetochore  
320 domains. Thus, minimal changes in Delta values upon suppression of microtubule forces by  
321 Taxol in IM cells imply one of the two possibilities. First, mechanic properties of IM kinetochores  
322 may fundamentally differ from those in humans. Second, the large decrease in Delta observed  
323 in human cells primarily reflects a change in overall shape/size of the kinetochore and not the  
324 distance between the layers of molecules. Similar physiological response of IM and human cells  
325 to Taxol, similar molecular composition of kinetochores [19], similar morphology of kinetochore  
326 plates in both species (Figure 1), and similar values of Delta in untreated cells (cf. Figure 2 and

327 [4]) render the first possibility unlikely. Therefore, Delta in human cells appears to reflect  
328 primarily larger scale deformations of malleable outer plate rather than elastic stretching within  
329 the plate (i.e., IKT). Our interpretation gains additional support from observations of different  
330 Delta values in sister kinetochores [8, 27, 29]. It is impossible for linearly connected elastic  
331 elements to simultaneously experience different levels of tension. In contrast, changes in the  
332 shape of kinetochore plate are expected to be independent for sister kinetochores and  
333 prominent differences in the shape of sister kinetochores is directly observed in EM (Figure 5 –  
334 Figure supplements 1,2).

335 In recent years, kSHREC analyses have led to contradictory conclusions regarding the  
336 nature of IKT as well as its role in mitotic progression. Some studies attribute 100% of changes  
337 in Delta to changes in the distance between various kinetochore proteins or conformational  
338 changes within a specific molecule [4]. Others conclude that Delta in part [8] or exclusively [10]  
339 reflects swiveling (angular reorientation) of kinetochores on the centromere instead of reporting  
340 correct intrakinetochore distances. These discrepancies are exaggerated by large differences in  
341 absolute values of Delta for the same pair of proteins that vary as much as 40% in different  
342 reports [4, 5, 8, 10]. In part, this lack of consensus may be due to different approaches to Delta  
343 measurements employed in different laboratories and there is a thoughtful debate on the  
344 conditions necessary for accurate localization of fluorescent spots in cells [5, 11]. However, a  
345 larger issue is whether the size of kinetochore is sufficiently small and whether the shape of this  
346 organelle is sufficiently invariant to allow unequivocal interpretation of Delta as the distance  
347 between various molecules. This issue has not been considered since the introduction of  
348 kSHREC approach a decade ago [4]. Our data presented here suggest that human  
349 kinetochores are too large, complexly shaped, and too flexible to be amenable to Delta  
350 measurements. While center-of-mass positions for various molecules can be determined with  
351 sub 10-nm precision, interpretation of Delta as the distance between molecules or the length of  
352 a molecule within the kinetochore [5] is valid only if the molecules form a parallel array within a

353 rigid disc of constant dimensions. Thus, currently there is no proof that kinetochores are  
354 amenable to SHREC-based analysis. This urges caution in literal interpretation of Delta as  
355 metrics for IKT or distance between subdomains within the kinetochore.



## 356 **Materials and Methods**

### 357 **Cell culture and drug treatments**

358 Immortalized hTERT-RPE1 constitutively expressing CenpA-GFP and Centrin-1-GFP [30] and  
359 hTERT-Indian Muntjac cells ([19], kind gift of Dr. Helder Maiato, Institute of Molecular and  
360 Cellular Biology, Porto, Portugal) were cultured in DMEM (Gibco, Life Technologies)  
361 supplemented with 10% FBS (Sigma-Aldrich F0926) at 37°C and 5% CO<sub>2</sub>. Taxol (Paclitaxel  
362 T7402-5MG; Sigma-Aldrich) and nocodazole (Calbiochem, #487928) were added ~ 15 min prior  
363 to fixation to final concentrations of 10- $\mu$ M and 3- $\mu$ M respectively.

### 364 **Time-lapse recordings**

365 Cells were seeded in 12.5 cm<sup>2</sup> Tissue Culture Flasks and grown in DMEM (Gibco, Life  
366 Technologies) supplemented with 10% FBS (Sigma-Aldrich F0926) and 25 mM HEPES (Gibco  
367 by Life Technologies REF 15630-080) at 37°C and 5% CO<sub>2</sub> for 24 h. Taxol was added in  
368 conditioned culture media to 5  $\mu$ M final concentration, 30 minutes prior to filming. Cells were  
369 imaged on Nikon TS100 microscopes equipped with a 10X objective lens (Nikon) at 37°C for  
370 48-72 h. Phase-contrast or Differential Interference Contrast images were captured at 2 min  
371 intervals on a Monochrome Spot IR camera. The microscope and light source were controlled  
372 by Spot 5.3 Advanced software (Diagnostic Instruments, Inc.).

### 373 **Immunofluorescence**

374 Cells were concurrently permeabilized and fixed in PEM buffer (100 mM Pipes, pH 6.9, 2.5 mM  
375 EGTA, and 5 mM MgCl<sub>2</sub>, pH 6.9) supplemented with 1% Triton X-100 and 1% glutaraldehyde  
376 (G5882; Sigma-Aldrich) or 1% Triton X-100 and 3.2% paraformaldehyde (EM grade; EMS) for  
377 10 min. Microtubules were visualized with DM1 $\alpha$  monoclonal anti- $\alpha$ -tubulin antibody at 1:100  
378 (T9026; Sigma-Aldrich) followed by a secondary antibody conjugated with Alexa Fluor 594 (A-

379 11032; Thermo Fisher Scientific) or Alexa Fluor 488 (A-11029, Thermo Fisher Scientific). Outer  
380 kinetochore was stained with a monoclonal 9G3/Hec1 antibody (Abcam ab3613) at 1:1000  
381 followed by a secondary antibody conjugated with Alexa Fluor 594 (A-21135; Thermo Fisher  
382 Scientific). In the experiments that involved immunostaining for endogenous CenpA, the cells  
383 were fixed in paraformaldehyde and postfixed in 100% methanol at  $-18^{\circ}\text{C}$  for 15 min.  
384 Endogenous CenpA was visualized with a mouse monoclonal antibody (3-19, Abcam; ab13939)  
385 at 1:200. Although both 3-19 (CENP-A) and 9G3 (Ndc80/Hec1) antibodies are mouse  
386 monoclonal, their isotypes are distinctly different, which allows highly specific co-staining. 3-19  
387 antibody was detected with IgG1 ( $\gamma$ 1)-specific secondary antibody conjugated to Alexa Fluor  
388 488 (Thermo Fisher Scientific, A-21121;), and 9G3 was detected with IgG2a ( $\gamma$ 2a) specific  
389 secondary antibody conjugated to Alexa Fluor 594 (Thermo Fisher Scientific, A-21135;), both at  
390 1:100 dilution.

391 Immunostained cells were embedded in non-solidifying media containing 90% glycerol,  
392 10% 1M Tris-Cl, pH 8.5, and 1 mg/ml PPDA. Wide-field fluorescence images were obtained on  
393 a Nikon TE2000E2 microscope equipped with 100x 1.49 NA PlanApo TIRF lens and LED  
394 illuminator (CoolLED PE 4000). Images were captured with an Andor Zyla 4.2 camera at 43-nm  
395 X-Y pixels and 200-nm Z steps. The system was controlled by Nikon NIS-Elements Advanced  
396 Research software (Nikon instruments). All images were deconvolved with SoftWorRx 5.0  
397 deconvolution software (Applied Precision), and objective lens-specific in-house-recorded point-  
398 spread functions. Deconvolution method was set to “Conservative”, noise level to “Medium” for  
399 kinetochores and “Low” for 100-nm beads, and the process ran for 10 iterations.

#### 400 **Serial section electron microscopy**

401 IM and RPE1 cells were fixed with 2.5% glutaraldehyde (G5882; Sigma-Aldrich) in PBS, pH7.4  
402 for 30 min, rinsed with PBS (3 X 5 min), and post-fixed with 2% OsO<sub>4</sub> in dH<sub>2</sub>O for 60 min at 4°C.  
403 The coverslips were then rinsed in dH<sub>2</sub>O, treated with 0.25% tannic acid for 20 min, and stained

404 with 2% uranyl acetate for 60 min. Dehydration was achieved by a series of ethanol solutions  
405 (30-50-70-80%–96%, 10 min in each solution) followed by acetone (10 min). After dehydration,  
406 cells were embedded in Epon 812 and cured for 48 hours at 60°C. Serial 70-nm thin sections  
407 were cut with a diamond knife (Diatome) on a Leica Ultracut UCT ultramicrotome and stained  
408 with lead citrate. Images were obtained on a JEOL 1400 microscope operated at 80 kV using a  
409 side-mounted 4.0 Megapixel XR401 sCMOS AMT camera (Advanced Microscopy Techniques  
410 Corp). Higher-magnification images (40K) were collected for individual kinetochores. These  
411 high-magnification images were subsequently used to trace kinetochores plates. 3-D volumes  
412 occupied by the kinetochores were visualized as isosurface models in Amira 5.3.3 (Visage  
413 Imaging).

#### 414 **Measurement of interkinetochore distances, Delta, and Full Width at Half Maximum** 415 **(FWHM) in IM cells**

416 Intensity profiles of selected centromeres (CenpA-GFP) with co-planar sister kinetochores  
417 (Ndc80/Hec1) were obtained for single-pixel lines ImageJ. Precise position and FWHM of the  
418 two Gaussian peaks in each of these profiles were obtained via the Peakfit MATLAB function  
419 developed by Dr. O'Haver ([https://www.mathworks.com/matlabcentral/fileexchange/23611-](https://www.mathworks.com/matlabcentral/fileexchange/23611-peakfit-m)  
420 [peakfit-m](https://www.mathworks.com/matlabcentral/fileexchange/23611-peakfit-m)). Profiles with fit errors larger than 3% were discarded (less than 3% of all profiles).

421 Interkinetochore distance (IKD) was calculated by subtracting the distance between the  
422 centers of CENP-A or Hec1 peaks. Delta values were calculated by subtracting the distance  
423 between the centers of CENP-A peaks from the distance between the centers of Ndc80/Hec1  
424 peaks and dividing the result by 2. In this approach, potential errors due to chromatic aberration  
425 are automatically negated by the opposite orientation of sister kinetochores. However, the same  
426 (average) value of Delta is assigned to both sister kinetochores.

427 **Measurement of interkinetochore distances, Delta, and Full Width at Half Maximum**  
428 **(FWHM) in RPE1 cells**

429 Precise positions and dimensions of fluorescent spots in RPE1 cells were obtained with the  
430 `delta_tool` MATLAB function described in reference [8] and available at  
431 <http://www.jcb.org/cgi/content/full/jcb.201412139/DC1>. This function determines x-y coordinate  
432 of the kinetochores center of mass via nonlinear fitting (`lsqcurvefit` MATLAB function) in  
433 projections of segmented volumes of kinetochores with a 2D Gaussian function. Z coordinates  
434 are estimated separately in x-z projections. Chromatic aberration errors are suppressed by  
435 shifting one color channel so that the global centers of mass for the red and green channels  
436 coincide. Delta is then calculated directly as the distance between the red and green centroids  
437 within the same kinetochore.

438 **Measurement of the outer plate length and curvature**

439 Length of the kinetochore outer plate was determined by tracing the contours of the plate with  
440 the Freehand line tool in ImageJ (National Institutes of Health). To determine curvature of the  
441 outer plate, a minimal rectangular box that encompasses the entire plate was drawn with the  
442 Rectangle tool of ImageJ. For a perfectly circular segment, curvature radius of an arc constraint  
443 within a rectangular box is calculated as  $R = W^2/8H + H/2$  where W is the length of the rectangle  
444 that defines the chord, and H is the height of the rectangle that defines the sagitta of the arc.

445 **Computational simulation for evaluation LM appearance of kinetochores with various**  
446 **architecture**

447 The simulation is made using a Matlab code, and the following parameters are considered.  
448 Kinetochores are modeled as two plates, each consisting of fixed number of molecules  
449 uniformly distributed randomly within a 3-D volume of specified dimensions and position relative  
450 to the other plate with the possibility of overlap. The volume is rectangular except for curvature

451 in either the XY or XZ planes with assumed rotational symmetry with respect to both the Z and  
452 Y axes. Two PSFs for “green” and “red” colors are constructed by convolving a single point with  
453 3-D gaussian filter (implemented via `fspecial3` function available in Matlab 2018b or a later  
454 version of Matlab). Widths of the PSFs are specified independently in XY plane and along Z  
455 direction. Convolved volumes are down-sampled to the XY pixel size and Z steps expected in  
456 LM by integrating intensity constrained within the part of convolved volume that corresponds to  
457 the specified LM voxel. Relative position of the down-sampled LM array with respect to the full-  
458 resolution convolved volume is randomized within 1 LM pixel to mimic random positions of  
459 kinetochores with respect to CCD pixels. Pseudo-experimental measurement of Delta and  
460 FWHM are conducted as in real experiments but within the simulated volume at LM resolution.  
461 Simulation code is available in the supplemental materials.

#### 462 **Preparation of illustrations**

463 Contrast and brightness of the final LM images were linearly adjusted in Photoshop (CS6) and  
464 the figures assembled in Illustrator (CS6; Adobe). Graphs were prepared in MATLAB or Excel  
465 and imported into Illustrator as PDFs.

#### 466 **Acknowledgements**

467 We thank Dr. Helder Maiato (i3S, Porto, Portugal) for the kind gift of IM cells expressing CenpA-  
468 GFP. Electron microscopy was performed with the help of the Wadsworth Center’s Electron  
469 Microscopy Core Facility. This work was supported by R35 GM130298 to A.K.

#### 470 **Competing Interests**

471 The authors declare no competing interests.

## 472 References

- 473 1. Musacchio, A., and Desai, A. (2017). A Molecular View of Kinetochores Assembly and  
474 Function. *Biology (Basel)* 6.
- 475 2. Magidson, V., Paul, R., Yang, N., Ault, J.G., O'Connell, C.B., Tikhonenko, I., McEwen,  
476 B.F., Mogilner, A., and Khodjakov, A. (2015). Adaptive changes in the kinetochore  
477 architecture facilitate proper spindle assembly. *Nat Cell Biol* 17, 1134-1144.
- 478 3. Sacristan, C., Ahmad, M.U.D., Keller, J., Fermie, J., Groenewold, V., Tromer, E., Fish,  
479 A., Melero, R., Carazo, J.M., Klumperman, J., et al. (2018). Dynamic kinetochore size  
480 regulation promotes microtubule capture and chromosome biorientation in mitosis. *Nat*  
481 *Cell Biol*.
- 482 4. Wan, X., O'Quinn, R.P., Pierce, H.L., Joglekar, A.P., Gall, W.E., DeLuca, J.G., Carroll,  
483 C.W., Liu, S.T., Jen, T.J., McEwen, B.F., et al. (2009). Protein architecture of the human  
484 kinetochore microtubule attachment site. *Cell* 137, 672-684.
- 485 5. Suzuki, A., Long, S.K., and Salmon, E.D. (2018). An optimized method for 3D  
486 fluorescence co-localization applied to human kinetochore protein architecture. *eLife* 7.
- 487 6. Maresca, T.J., and Salmon, E.D. (2009). Intrakinetochore stretch is associated with  
488 changes in kinetochore phosphorylation and spindle assembly checkpoint activity. *J Cell*  
489 *Biol* 184, 373-381.
- 490 7. Maresca, T.J., and Salmon, E.D. (2010). Welcome to a new kind of tension: translating  
491 kinetochore mechanics into a wait-anaphase signal. *J Cell Sci* 123, 825-835.
- 492 8. Magidson, V., He, J., Ault, J.G., O'Connell, C.B., Yang, N., Tikhonenko, I., McEwen,  
493 B.F., Sui, H., and Khodjakov, A. (2016). Unattached kinetochores rather than  
494 intrakinetochore tension arrest mitosis in taxol-treated cells. *J Cell Biol* 212, 307-319.
- 495 9. Etemad, B., Kuijt, T.E., and Kops, G.J. (2015). Kinetochore-microtubule attachment is  
496 sufficient to satisfy the human spindle assembly checkpoint. *Nat Commun* 6, 8987.
- 497 10. Smith, C.A., McAinsh, A.D., and Burroughs, N.J. (2016). Human kinetochores are swivel  
498 joints that mediate microtubule attachments. *eLife* 5.
- 499 11. Fuller, C.J., and Straight, A.F. (2012). Imaging nanometre-scale structure in cells using  
500 in situ aberration correction. *J Microsc* 248, 90-101.
- 501 12. Churchman, L.S., and Spudich, J.A. (2012). Single-molecule high-resolution  
502 colocalization of single probes. *Cold Spring Harb Protoc* 2012, 242-245.
- 503 13. Churchman, L.S., Okten, Z., Rock, R.S., Dawson, J.F., and Spudich, J.A. (2005). Single  
504 molecule high-resolution colocalization of Cy3 and Cy5 attached to macromolecules  
505 measures intramolecular distances through time. *Proc Natl Acad Sci U S A* 102, 1419-  
506 1423.
- 507 14. Brinkley, B.R., and Stubblefield, E. (1966). The fine structure of the kinetochore of a  
508 mammalian cell in vitro. *Chromosoma* 19, 28-43.
- 509 15. Pereira, C., Reis, R.M., Gama, J.B., Celestino, R., Cheerambathur, D.K., Carvalho, A.X.,  
510 and Gassmann, R. (2018). Self-Assembly of the RZZ Complex into Filaments Drives  
511 Kinetochore Expansion in the Absence of Microtubule Attachment. *Curr Biol* 28, 3408-  
512 3421 e3408.
- 513 16. Rodriguez-Rodriguez, J.A., Lewis, C., McKinley, K.L., Sikirzhitski, V., Corona, J.,  
514 Maciejowski, J., Khodjakov, A., Cheeseman, I.M., and Jallepalli, P.V. (2018). Distinct  
515 Roles of RZZ and Bub1-KNL1 in Mitotic Checkpoint Signaling and Kinetochore  
516 Expansion. *Curr Biol* 28, 3422-3429 e3425.
- 517 17. Chi, J.X., Huang, L., Nie, W., Wang, J., Su, B., and Yang, F. (2005). Defining the  
518 orientation of the tandem fusions that occurred during the evolution of Indian muntjac  
519 chromosomes by BAC mapping. *Chromosoma* 114, 167-172.

- 520 18. Brinkley, B.R., Valdivia, M.M., Tousson, A., and Brenner, S.L. (1984). Compound  
521 kinetochores of the Indian muntjac. Evolution by linear fusion of unit kinetochores.  
522 *Chromosoma* 91, 1-11.
- 523 19. Drpic, D., Almeida, A.C., Aguiar, P., Renda, F., Damas, J., Lewin, H.A., Larkin, D.M.,  
524 Khodjakov, A., and Maiato, H. (2018). Chromosome Segregation Is Biased by  
525 Kinetochores Size. *Curr Biol* 28, 1344-1356 e1345.
- 526 20. Rieder, C.L. (1982). The formation, structure, and composition of the mammalian  
527 kinetochores and kinetochore fiber. *International Review of Cytology* 79, 1-58.
- 528 21. Roos, U.P. (1973). Light and electron microscopy of rat kangaroo cells in mitosis. II.  
529 Kinetochores structure and function. *Chromosoma* 41, 195-220.
- 530 22. Suzuki, A., Badger, B.L., Wan, X., DeLuca, J.G., and Salmon, E.D. (2014). The  
531 architecture of CCAN proteins creates a structural integrity to resist spindle forces and  
532 achieve proper intrakinetochores stretch. *Dev Cell* 30, 717-730.
- 533 23. Marshall, O.J., Marshall, A.T., and Choo, K.H. (2008). Three-dimensional localization of  
534 CENP-A suggests a complex higher order structure of centromeric chromatin. *J Cell Biol*  
535 183, 1193-1202.
- 536 24. Suzuki, A., Hori, T., Nishino, T., Usukura, J., Miyagi, A., Morikawa, K., and Fukagawa, T.  
537 (2011). Spindle microtubules generate tension-dependent changes in the distribution of  
538 inner kinetochores proteins. *J Cell Biol* 193, 125-140.
- 539 25. Ledbetter, M.C., and Porter, K.R. (1963). A "Microtubule" in Plant Cell Fine Structure. *J*  
540 *Cell Biol* 19, 239-250.
- 541 26. de-The, G. (1964). Cytoplasmic Microtubules in Different Animal Cells. *J Cell Biol* 23,  
542 265-275.
- 543 27. Uchida, K.S., Takagaki, K., Kumada, K., Hirayama, Y., Noda, T., and Hirota, T. (2009).  
544 Kinetochores stretching inactivates the spindle assembly checkpoint. *J Cell Biol* 184, 383-  
545 390.
- 546 28. Alov, I.A., and Lyubskii, S.L. (1977). Functional morphology of the kinetochores. *Int Rev*  
547 *Cytol Suppl*, 59-74.
- 548 29. Dumont, S., Salmon, E.D., and Mitchison, T.J. (2012). Deformations within moving  
549 kinetochores reveal different sites of active and passive force generation. *Science* 337,  
550 355-358.
- 551 30. Magidson, V., O'Connell, C.B., Loncarek, J., Paul, R., Mogilner, A., and Khodjakov, A.  
552 (2011). The spatial arrangement of chromosomes during prometaphase facilitates  
553 spindle assembly. *Cell* 146, 555-567.

555

556

557 **Figure Legends**

558 **Figure 1. Kinetochores architecture in human and Indian muntjac cells and the approach**

559 **to Delta measurements. (A)** Human (RPE1) cell with inner and outer kinetochores domains

560 labeled via expression of CenpA-GFP (green) and immunostaining for Ndc80/Hec1 (red).

561 Paraformaldehyde (PFA) fixation. DNA is counterstained with Hoechst 33342 (blue). Maximum-

562 intensity projection through the entire cell. Centrioles (asterisks) are labeled via expression of

563 Centrin-1-GFP. **(A')** Higher-magnification of sister kinetochores boxed in A. Both inner (CenpA)

564 and outer (Hec1) kinetochores proteins appear as small spots. **(B)** Indian muntjac (IM) cell with

565 inner and outer kinetochores domains labeled as in A. PFA fixation. **(B')** Higher-magnification of

566 sister kinetochores boxed in B. Inner and outer kinetochores proteins form thin layers with

567 discernable orientation. Lines denote positions of scan profiles presented in E. **(C)** A 70-nm EM

568 section through a kinetochores in metaphase RPE1 cell. Arrows denote the trilaminar plate

569 comprising ~25 nm thin electron dense inner and outer layers (arrows) separated by a ~25-nm

570 thin translucent middle layer. The plate is ~300 nm long (curly brackets). **(D)** A 70-nm EM

571 section through a kinetochores in IM metaphase. Arrows and curly brackets as in panel C. The

572 plate is ~1000-nm long and ~75 nm wide. (E) Line profiles across co-planar sister kinetochores

573 in IM scanned orthogonally to the plates (position of the scan line is marked in B'). Markers are

574 pixel intensities, lines are Gaussian fits. Inter-kinetochores distances IKDg and IKDr are the

575 distances between maxima of the two green and two red peaks correspondingly. Delta is

576 determined as half of the difference between IKDr and IKDg.

577 **Figure 2 (with 3 supplements). Delta does not decrease significantly in Taxol-treated IM**

578 **cells. (A)** Scatterplots of CenpA (green) - Hec1 (red) Delta versus interkinetochores (CenpA-

579 CenpA) distance for untreated metaphase and Taxol-treated IM cells. PFA fixation, followed by

580 methanol. Dashed lines denote mean. Mean  $\pm$  standard deviation (SD) also shown numerically.

581 **(B)** IM cell with inner and outer kinetochores domains labeled via expression of CenpA-GFP



582 (green) and immunostaining for Ndc80/Hec1 (red). Glutaraldehyde (GA) fixation. Notice that the  
583 intensity of staining is similar to Figure 1B although chromosome arms appear slightly more  
584 condensed. **(B')** Higher-magnification of sister kinetochores boxed in B. Scale bar = 500 nm. **(C)**  
585 Scatterplots of CenpA-GFP (green) - Hec1 (red) Delta versus interkinetochore (CenpA-GFP –  
586 CenpA-GFP) distance for untreated, Taxol-, and nocodazole-treated IM cells. PFA fixation.  
587 Mean  $\pm$  standard deviation (SD) shown. **(D)** As in C but cells are fixed with GA.

588 **Figure 3. Kinetochores layers in IM cells are wide and their width changes upon Taxol and**  
589 **nocodazole treatments.** **(A)** Examples of line-scans (white lines) across individual  
590 microtubules or kinetochore plates in cells fixed with Paraformaldehyde (PFA) or  
591 Glutaraldehyde (GA). **(B)** Fluorescence profiles corresponding to line-scans shown in A.  
592 Markers are pixel intensities, lines are Gaussian fits. Values of the Full Width at Half-Maximum  
593 (FWHM) are shown for each profile. Notice that fluorescence peaks of inner- and outer-  
594 kinetochore layers are significantly wider than the peaks of individual microtubules. **(C)** Box  
595 plots presenting measurements of FWHM for microtubules, inner- (CenpA-GFP), and outer-  
596 (Hec1) kinetochore layers in untreated, Taxol- and nocodazole- treated metaphases after PFA  
597 (left) and GA (right) fixation. Notice that FWHM of Hec1 layer increases in Taxol- and  
598 nocodazole-treated cells. Increase in CenpA-GFP layer is apparent after PFA but not after GA  
599 fixation. Student's t-test p values are less than  $10^{-4}$  (\*\*\*\*),  $10^{-5}$  (\*\*\*\*\*), or greater than 0.5 (NS).

600 **Figure 4 (with 2 supplements). Inner and outer layers of human kinetochores are wide**  
601 **and spatially overlap.** **(A)** Layout of computational model used to predict LM appearance of  
602 human kinetochores. Randomized distribution of molecules within a specified 3-D shape is  
603 convolved with wavelength-specific Gaussian point-spread function (PSF). Convolved volumes  
604 are then downsampled to the voxel size typical in conventional LM. **(B)** LM images and intensity  
605 profiles of a 100-nm multicolor bead shown in green (515-nm) and red (580-nm) colors. FWHM  
606 is reported for the longer axis in XY plane. **(C)** Predicted LM appearance for kinetochores

607 shaped as 300 x 250 nm rectangular prism with 50-nm wide layers separated by 140 nm. Delta  
608 and FWHM values are measured in pseudo-LM volume constructed at 40-nm XY pixels and  
609 200-nm Z-steps. **(D)** LM images and intensity profiles of a human kinetochore with typical  
610 values of Delta and FWHM (see Figure S2). Notice that both inner (CenpA-GFP) and outer  
611 (Hec1) domains are round and significantly larger than a diffraction-limited spot. **(E)** Predicted  
612 LM appearance for kinetochores shaped as 300 x 250 nm rectangular prism with widths typical  
613 for inner and outer layers observed in IM cells. Centers of the layers are separated by 140 nm.  
614 Delta and FWHM values are measured in pseudo-LM volume constructed at 40-nm XY pixels  
615 and 200-nm Z-steps.

616 **Figure 5 (with 2 supplements). Kinetochore plates are curved and their length but not**  
617 **curvature increases in Taxol-treated human cells. (A)** Effects of the plate curvature and  
618 length on the value of Delta. For parallel straight lines of any length value of Delta matches the  
619 distance separating the lines. In contrast, for circular arcs, Delta is smaller than the distance  
620 separating the lines and the difference depends on the curvature and length of the arc. **(B)** 70-  
621 nm EM sections through typical kinetochores in untreated (left) vs. Taxol-treated RPE1 cells  
622 (see Figure 5 – Figure supplements 1,2). **(B')** Kinetochore plate in Taxol-treated cell is longer  
623 and the outer layer fits within a rectangular box of greater length and width than in untreated  
624 cell. **(B'')** Surface-rendered reconstructions from serial sections demonstrate complexity of the  
625 outer plate shape in 3-D space. **(C)** Frequency of plates with various lengths in untreated (N =  
626 87 kinetochores) and Taxol-treated (N = 38 kinetochores) cells. Mean values of plate length are  
627  $283 \pm 54$  in control and  $410 \pm 84$  in Taxol-treated cells. **(D)** Dimensions of the bounding box  
628 required to encompass the outer plate in untreated ( $270 \pm 47$  by  $61 \pm 18$  nm) vs. Taxol-treated  
629 cells ( $350 \pm 57$  by  $110 \pm 39$  nm) suggest that the outer plate resembles a circular arc with ~190-nm  
630 radius. **(E)** Predicted LM appearance for kinetochores that comprise 250-nm wide layers with  
631 length and curvature observed in untreated RPE1 cells. Notice that centers of the green and red

632 layers need to be separated by ~155 nm to achieve the expected 145-nm Delta. **(F)** Predicted  
633 change in the LM appearance and Delta due to increased length of the plate. All other  
634 simulation parameters are identical to (E).

635 **Video legends**

636 **Video 1. Effects of Taxol on RPE1 cells.** Cells that enter mitosis (manifested by the  
637 characteristic round morphology) in the presence of 5- $\mu$ M Taxol remain arrested and eventually  
638 die. Phase-contrast microscopy. Time stamp in hours: minutes. Selected time points from this  
639 recording are shown in Figure 2 - figure supplement 1C.

640 **Video 2. Effects of Taxol on IM cells.** Taxol treatment and filming conditions identical to Video  
641 1. Selected time points from this recording are shown in Figure 2 - figure supplement 1C.

642 **Video 3. Distribution and appearance of kinetochores during metaphase in RPE1 cell.**  
643 Numbers denote centromeres with sister kinetochores indexed as 'a' and 'b'. Each kinetochore  
644 is labeled in green (CenpA-GFP) and red (Hec1 visualized with Alexa594). Centrosomes (Ca  
645 and Cb) are labeled with Centrin1-GFP. Chromosomes are stained with Hoechst 33342 (blue).  
646 Scale bar in the bottom-right corner applies to X–Y planes; depth of each plane is denoted in  
647 the top-left corner. All 92 kinetochores from this volume are shown at high magnification in  
648 Figure 4 - figure supplement 1. Notice that spatial proximity of kinetochore 7a to 8a as well as  
649 17a to 18a preclude accurate Delta and FWHM measurements for centromeres 7, 8, 17, and  
650 18. Glutaraldehyde fixation.

651 **Video 4. Distribution and appearance of kinetochores in Taxol-treated RPE1 cell.** Taxol  
652 added ~15 min prior to fixation when the cell had assembled a bipolar spindle with congressed  
653 chromosomes. Fixation, staining, and imaging conditions identical to Video 3. All 92  
654 kinetochores from this volume are shown at high magnification in Figure 4 - figure supplement  
655 2. Notice that Delta and FWHM measurements were not obtained for centromeres 7-9, 11, 27,  
656 30, 33, and 38-42 due to spatial overlap among their kinetochores. Glutaraldehyde fixation.

657 **Source-data files**

658 **Figure 2 – source data 1.** Numeric values for data presented in panels A, C, and D. Data for  
659 each plot are compiled in a tab within MS Excel file.

660 **Figure 3 – source data 1.** Numeric values for data presented in panel C. Data for each  
661 experimental condition are compiled in a tab within MS Excel file.

662 **Figure 4 – source data 1.** Computer code used to generate panels A, C, and E. Requires  
663 MATLAB 2018b to run.

664 **Figure 5 – source data 1.** Numeric values for panels C and D. MS Excel format.

665 **Figure 5 – source data 2.** Computer code used to generate panels E and F. The same code is  
666 also used in Figure 4. Requires MATLAB 2018b to run.

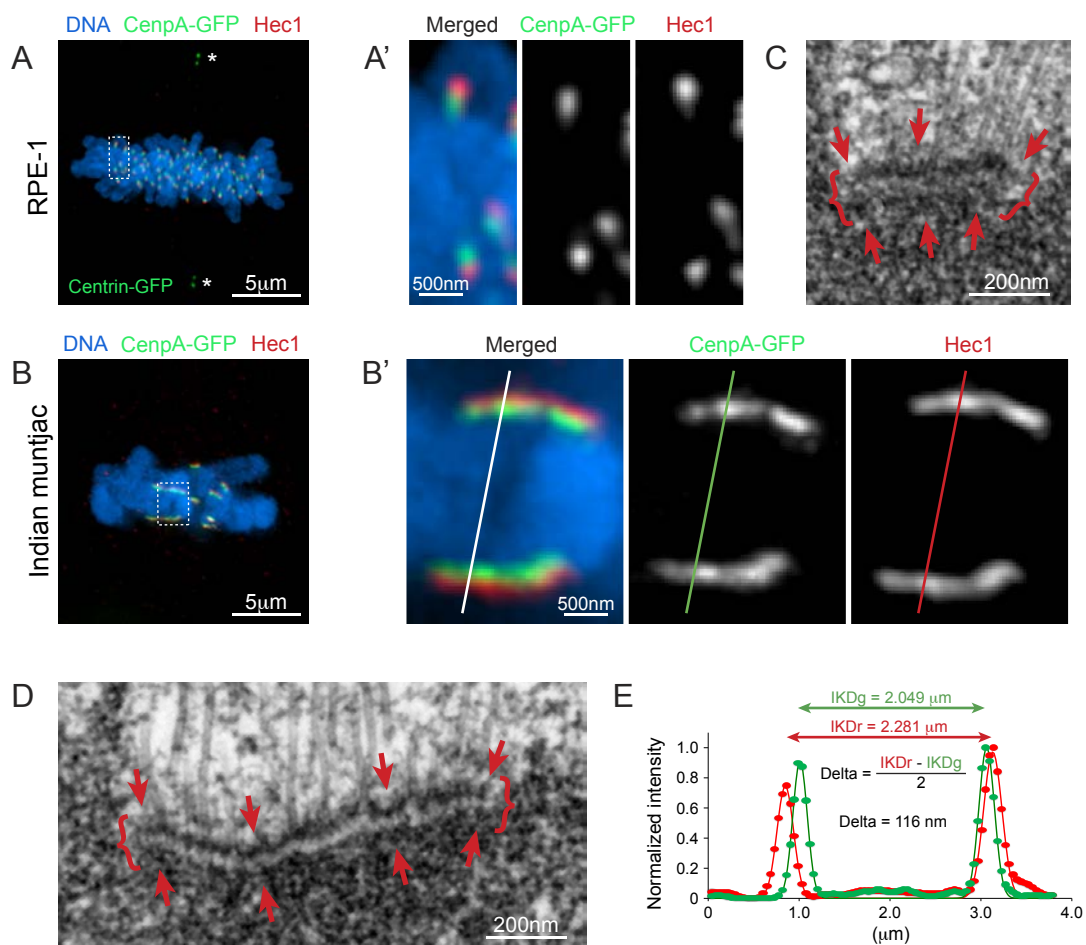

Figure 1

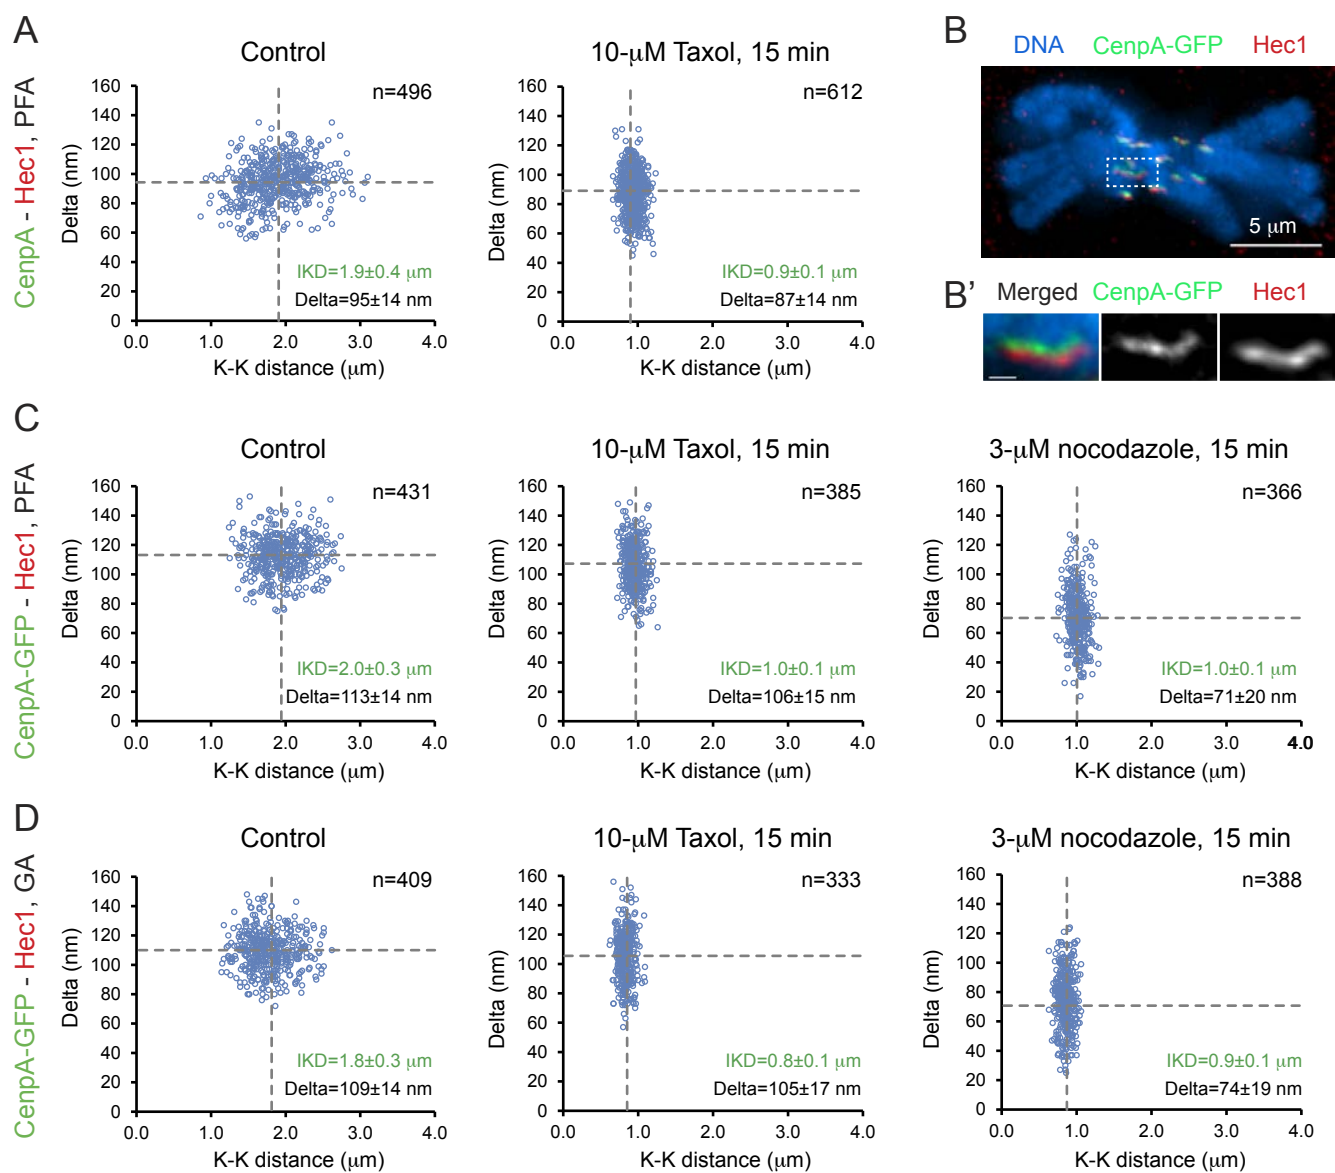

Figure 2

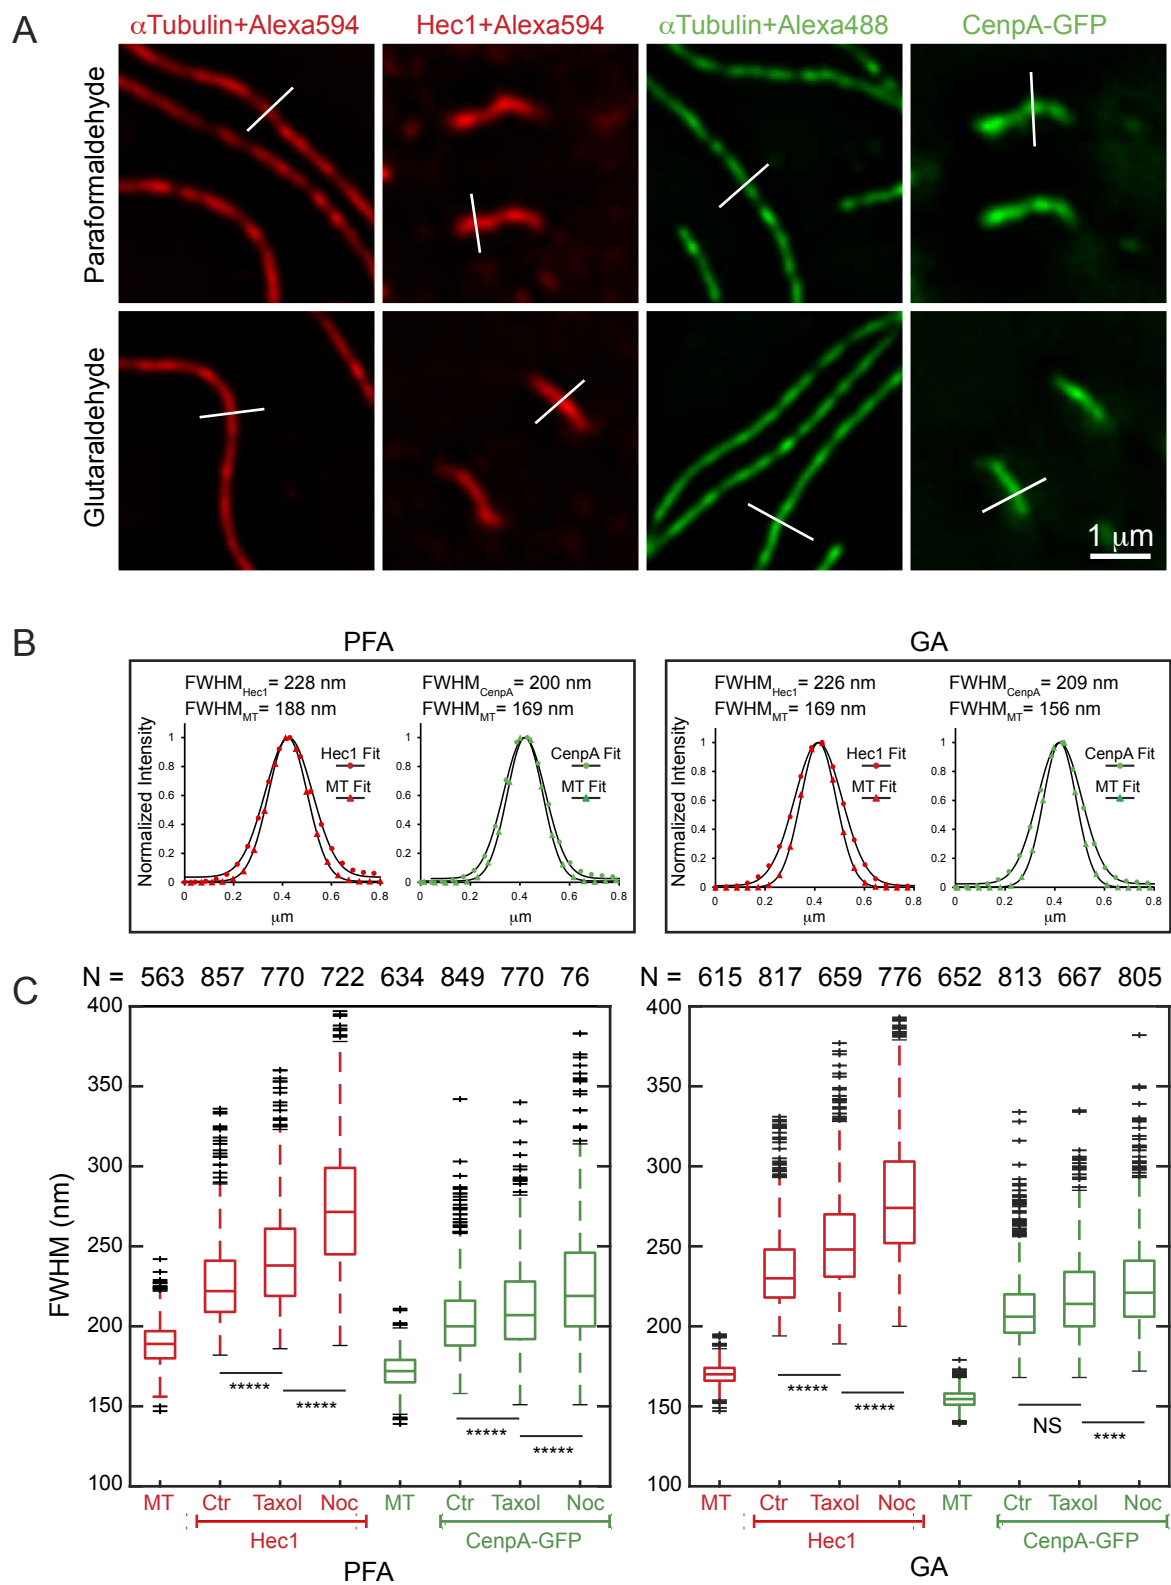

Figure 3



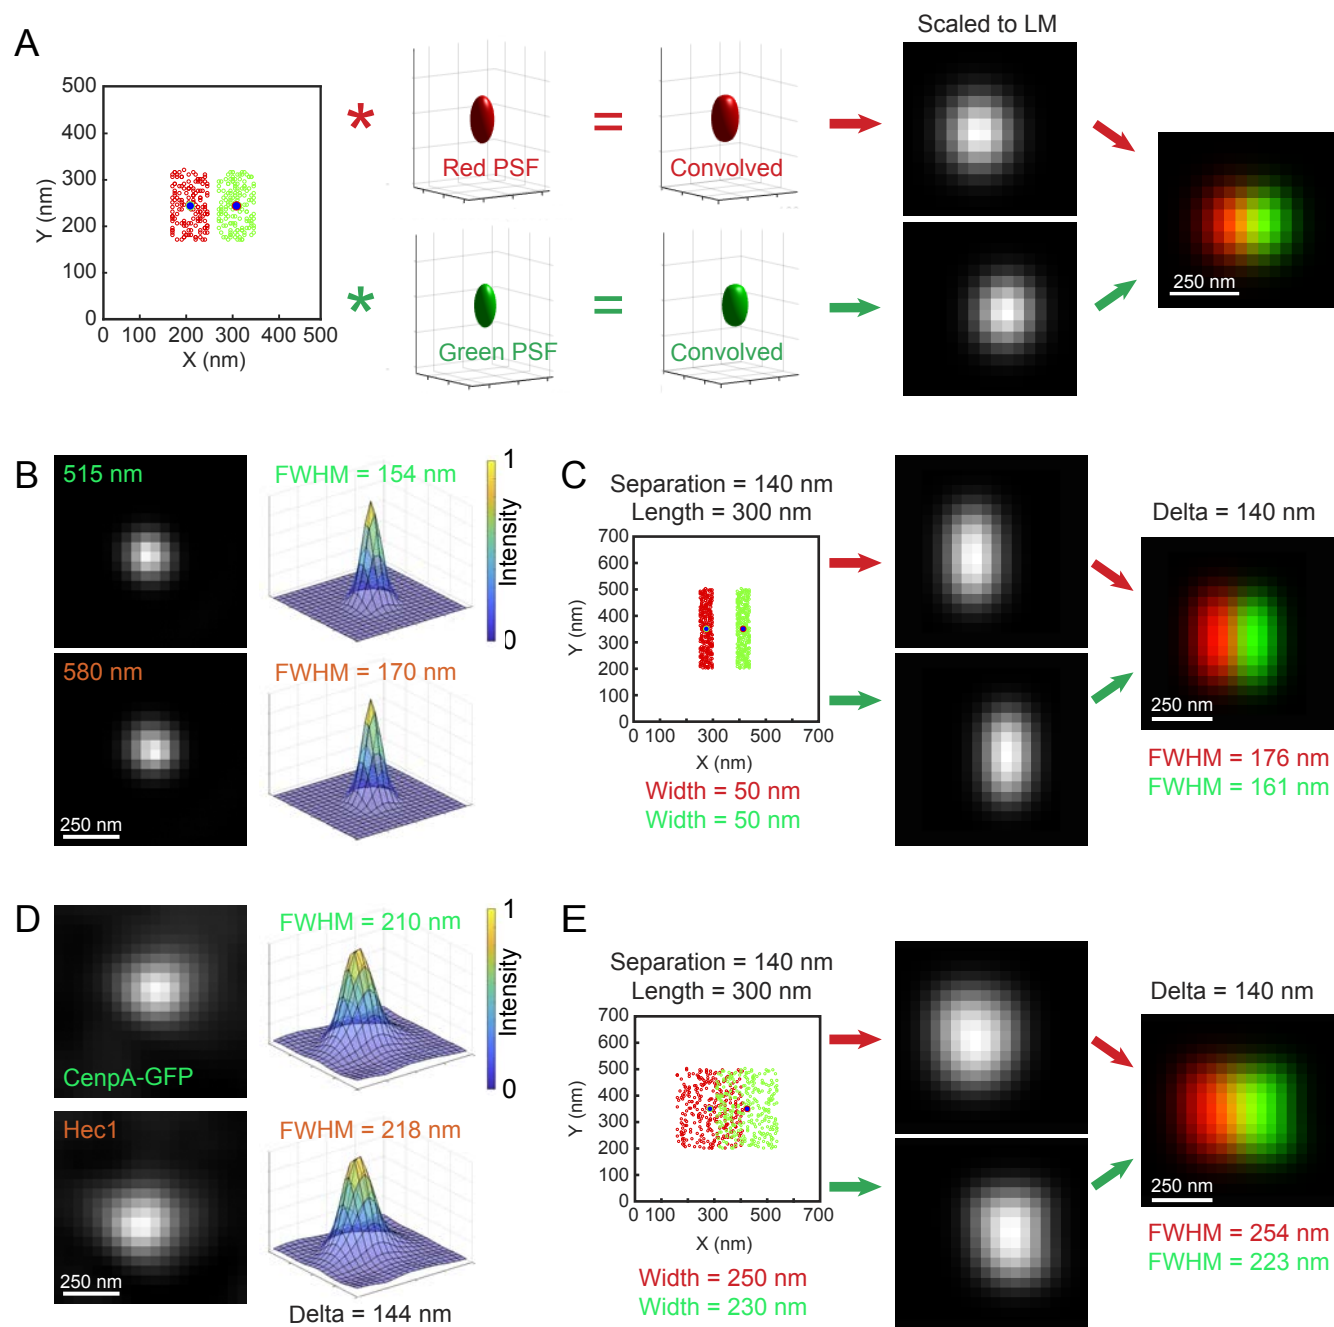

Figure 4

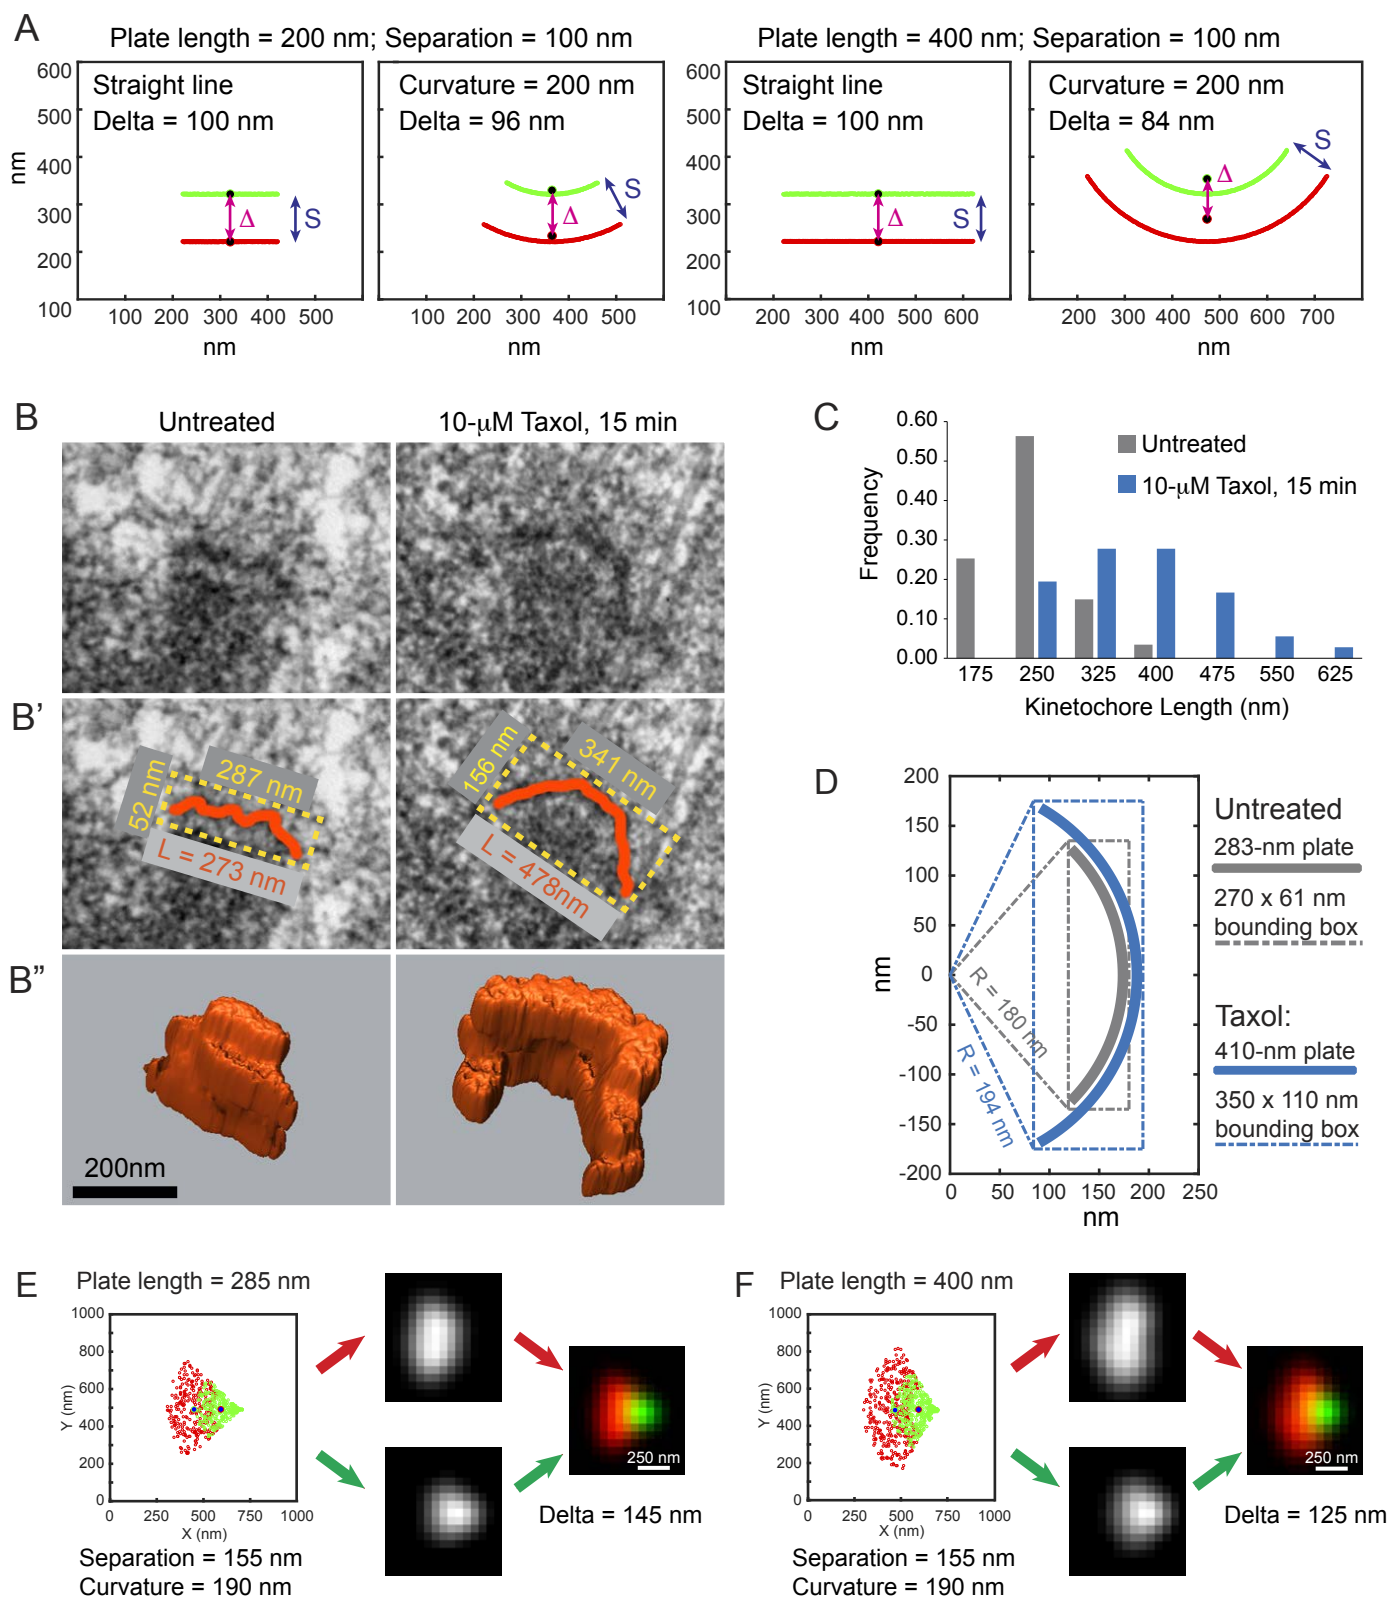

Figure 5

## Supplemental Figures

**Figure 2 – figure supplement 1. Effects of Taxol in IM and human cells. (A - B)** Similar changes in mitotic spindle architecture in human Rpe1 (A) and IM (B) cells. Approximately 15 min after addition of Taxol (10  $\mu$ M final concentration), already assembled mitotic spindles remain bipolar with congressed chromosomes in both human and IM cells. Microtubules density decreases near chromosomes and increases near spindle poles (A) Maximum-intensity projection (MIP) of an untreated (top) and Taxol-treated (bottom) Rpe1 metaphases. (B) MIP of an untreated (top) and Taxol-treated (bottom) IM metaphases. Kinetochores are labeled via expression of CenpA-GFP (green); microtubules are immunostained with a monoclonal antibody (DM1A, Sigma) against  $\alpha$ -tubulin (red); chromosomes are stained with DNA dye Hoechst 33342 (blue). Rpe1 cells additionally express Centrin1-GFP that marks positions of centrioles/spindle poles (arrowheads in A). **(C)** Stringent mitotic arrest in Rpe1 (top) and IM (bottom) in the presence of 5- $\mu$ M Taxol. In both cell types mitosis is arrested for >20 hrs and most cells subsequently die. Selected video frames from a 48-hr long time-lapse recording at 2-min intervals (see Videos 1 and 2 for full recordings).

**Figure 2 – figure supplement 2. Large Kinetochores morphology in Indian muntjac metaphase.** 70-nm serial EM sections from a full series through the centromere region of the chromosome. Notice the length of plate (orange arrows) and the prominent number of microtubules attached to the kinetochores. 3D reconstruction (bottom, right) of the outer layers corresponds to the kinetochores shown in EM sections.

**Figure 2 – figure supplement 3. Shape and dimensions of the kinetochores remain constant in Taxol-treated IM metaphase** Serial EM sections spanning large kinetochores in Taxol-treated metaphase and 3D reconstruction (bottom, right) of the outer layers corresponds to the kinetochores shown in EM sections. No difference in shape kinetochores although the number of microtubules attached to the kinetochores plate (orange arrows) decreases after ~15 min

incubation with 10  $\mu$ m-Taxol. Depth occupied by each section within the volume is shown in nanometers.

**Figure 4 – figure supplement 1. Size and shape variability of inner and outer layers of human kinetochores.** 46 pairs of kinetochores in a typical Rpe1 cell during metaphase. Glutaraldehyde fixation. Numbers denote arbitrary indexes assign to chromosomes. Sister kinetochores oriented towards opposite spindle poles are marked as ‘a’ and ‘b’. Inner and outer kinetochore layers are labeled via CenpA-GFP expression (green) and immunostaining for Hec1 (red). Double arrows denote orientation of the longer axis (in XY) for Hec1 spots. Notice that kinetochore spots are larger than spots formed by 100-nm beads (shown in the bottom row). The shape of kinetochore spots and orientation of the longer axis are variable. Kinetochores on chromosomes 7, 8, 17, and 18 could not be segmented due to spatial overlap. These kinetochores were not considered in calculation of Delta, FWHM, and orientation of the larger axis. 3-D volume of the entire cell that depicts orientation of the spindle and positions of individual chromosomes/kinetochores is shown in Video 2. Kinetochore 27b is shown in Fig.4E.

**Figure 4 – figure supplement 2. Size and shape variability of inner and outer layers of human kinetochores treated with Taxol.** 46 pairs of kinetochores in a typical Rpe1 cell after 15-min exposure to 10  $\mu$ M Taxol. Glutaraldehyde fixation. Numbers denote arbitrary indexes assign to chromosomes. Sister kinetochores oriented towards opposite spindle poles are marked as ‘a’ and ‘b’. Inner and outer kinetochore layers are labeled via CenpA-GFP expression (green) and immunostaining for Hec1 (red). Double arrows denote orientation of the longer axis (in XY) for Hec1 spots. Notice that kinetochore spots are larger than spots formed by 100-nm beads (shown in the bottom row). The shape of kinetochore spots and orientation of the longer axis are variable. Kinetochores on chromosomes 4, 7-9, 11, 27, 30, 33, and 38-42 could not be segmented due to spatial overlap. These kinetochores were not considered in calculation of Delta, FWHM,

and orientation of the larger axis. 3-D volume of the entire cell that depicts orientation of the spindle and positions of individual chromosomes/kinetochores is shown in Video 3.

**Figure 5 – figure supplement 1. 3-D reconstruction of kinetochores from a metaphase Rpe1 cell. (A)** Selected serial 70-nm EM sections through the centromere. Numbers indicate relative depth of each section within the volume. Arrows denote the outer electron dense layers of the plates that were traced and segmented to construct a 3-D surface-rendered model shown in **(B)**. Section ‘281-350 nm’ and a different view of surface-rendered upper kinetochore are shown in Fig.5b.

**Figure 5 – figure supplement 2. 3-D reconstruction of kinetochores in Taxol-treated Rpe1 cell. (A)** Selected serial 70-nm EM sections through the centromere. Numbers indicate relative depth of each section within the volume. Arrows denote the outer electron dense layers of the plates that were traced and segmented to construct a 3-D surface-rendered model shown in **(B)**. Section ‘211-280 nm’ and a different view of surface-rendered upper kinetochore are shown in Fig.5b.

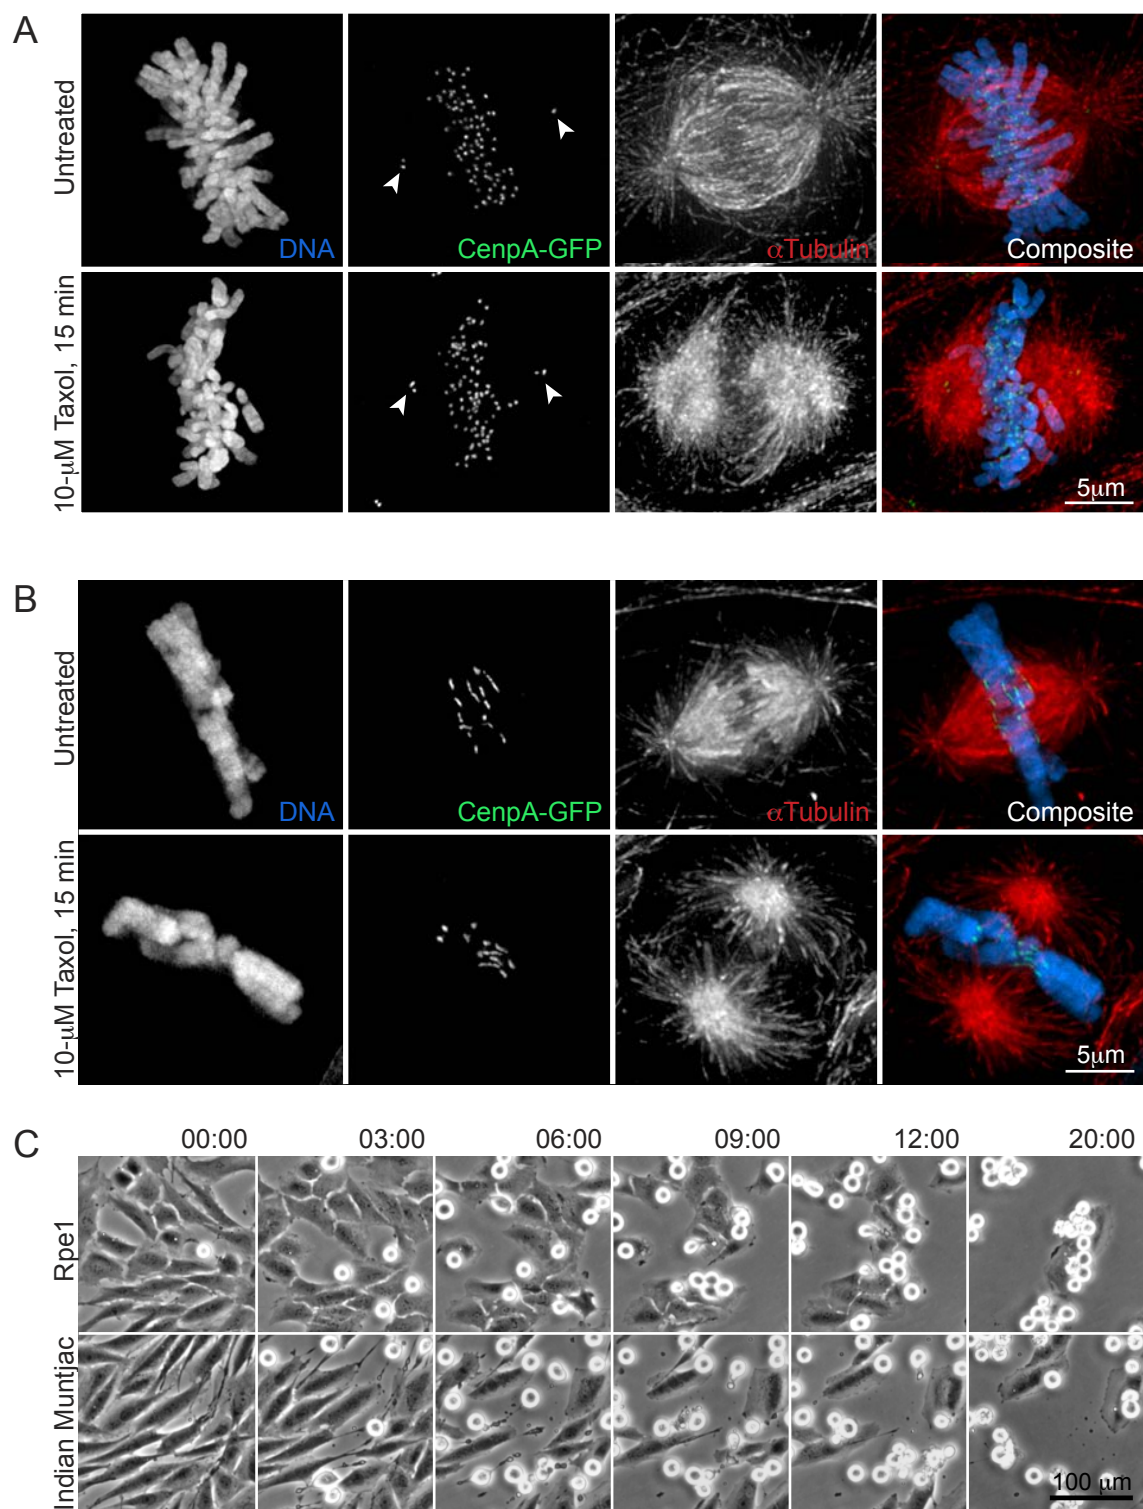

Figure 2 - figure supplement 1

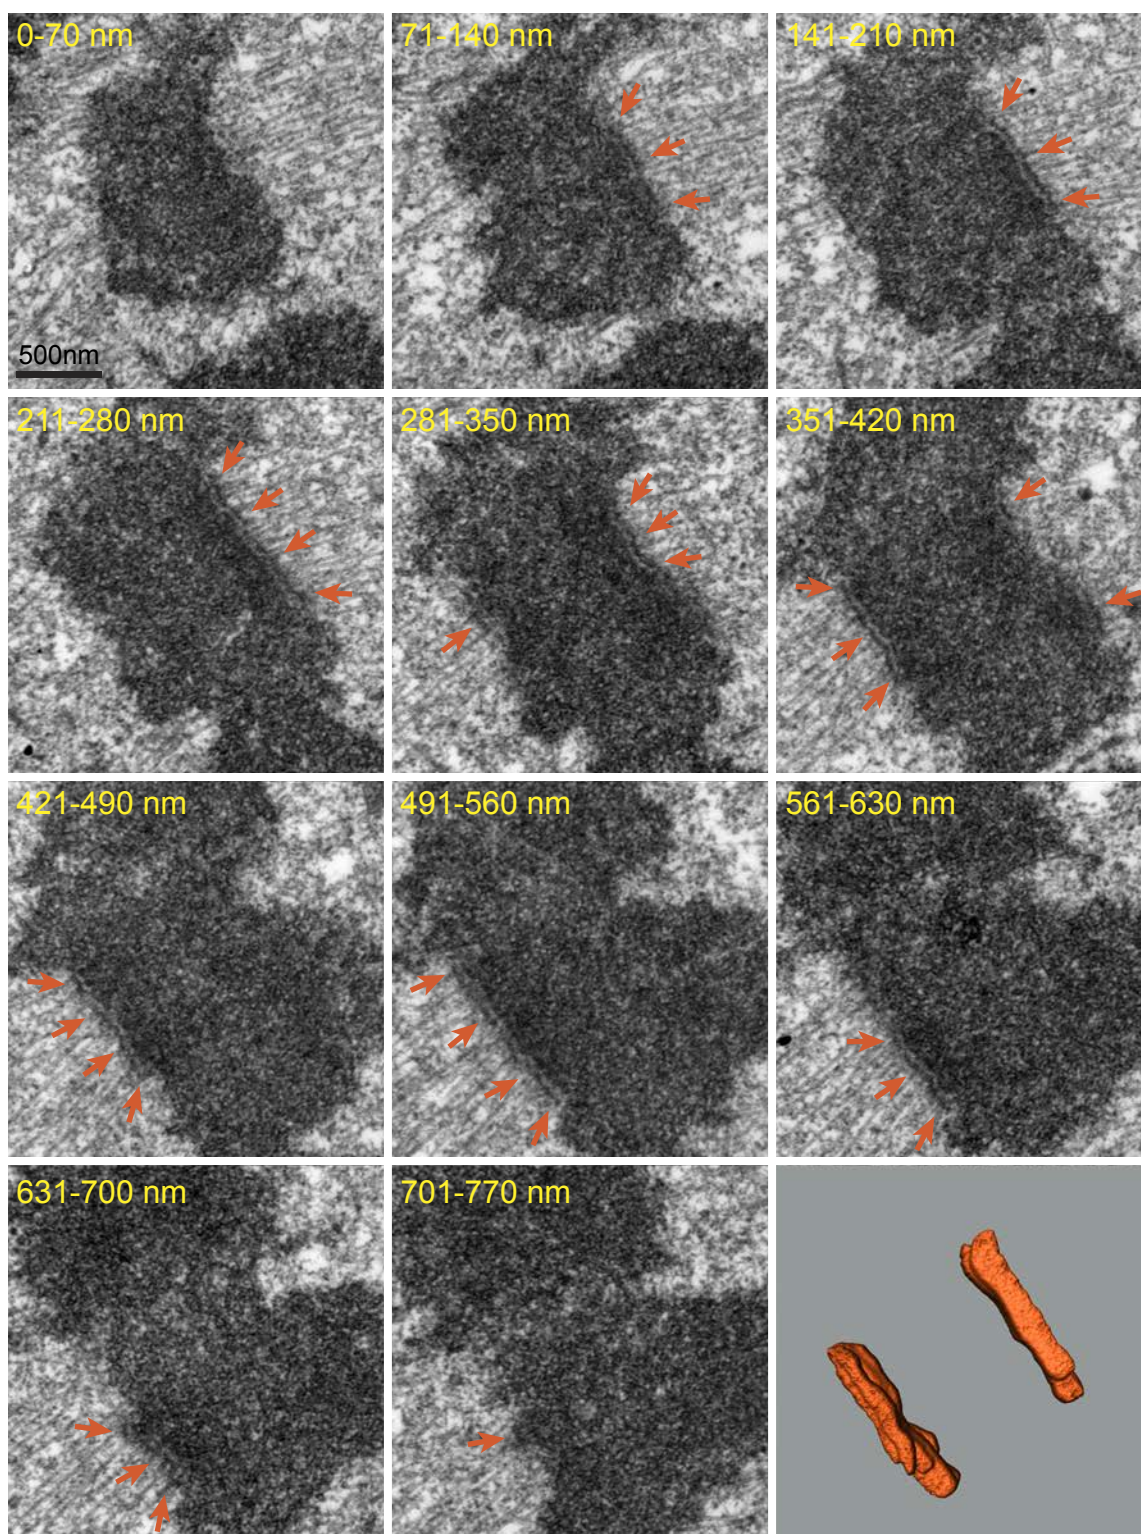

Figure 2 - figure supplement 2

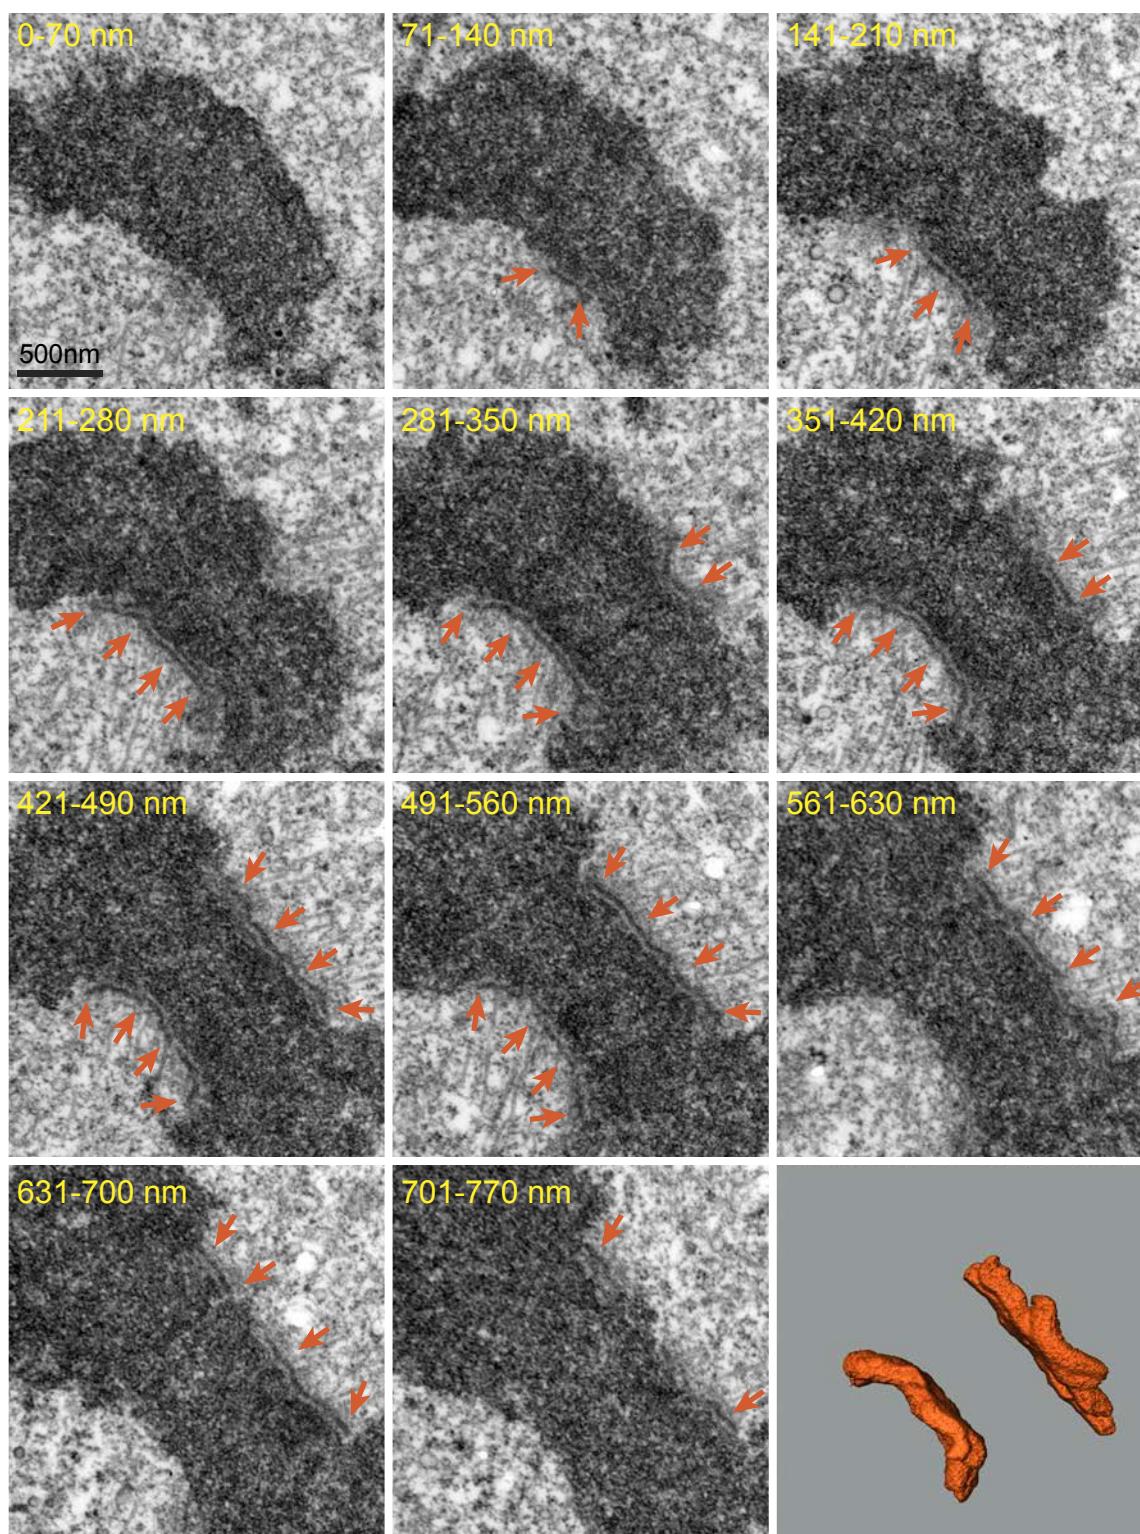

Figure 2 - figure supplement 3



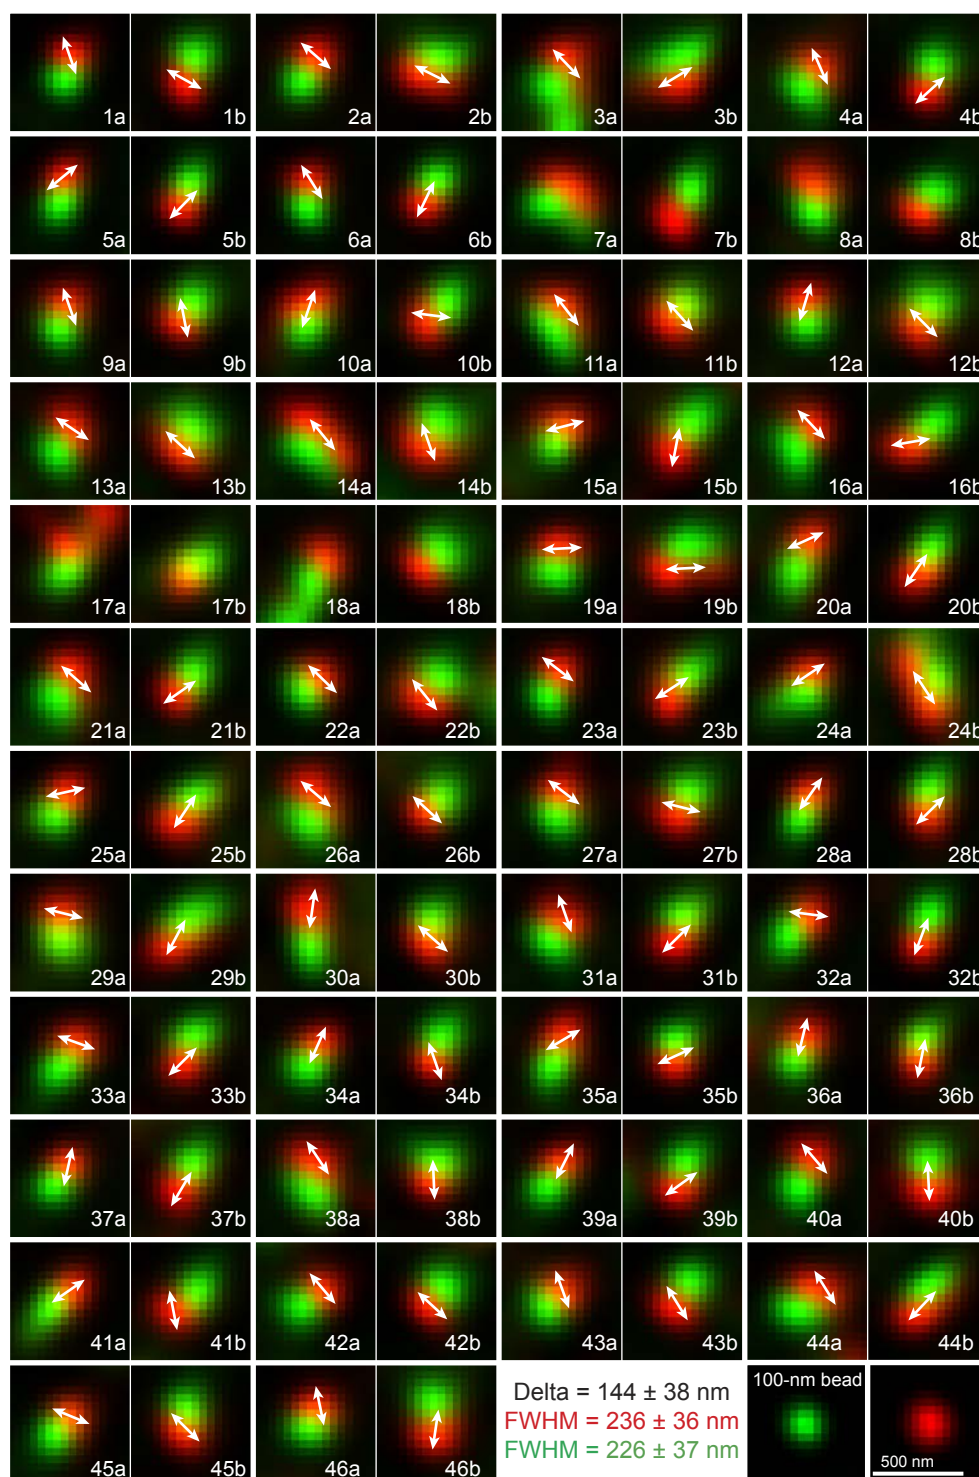

Figure 4 - figure supplement 1

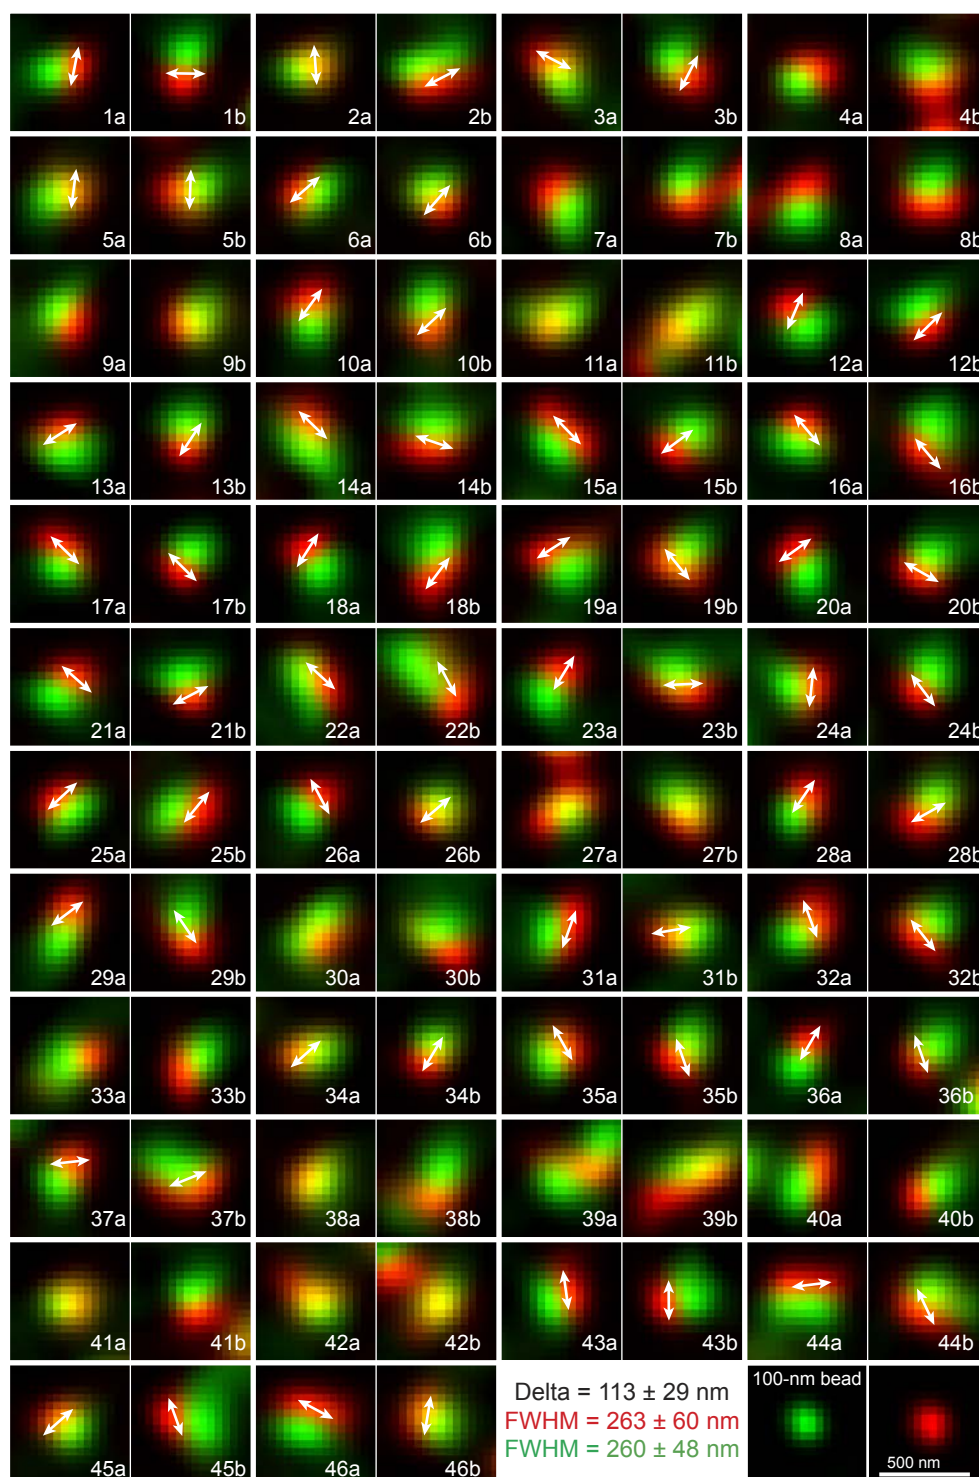

Figure 4 - figure supplement 2

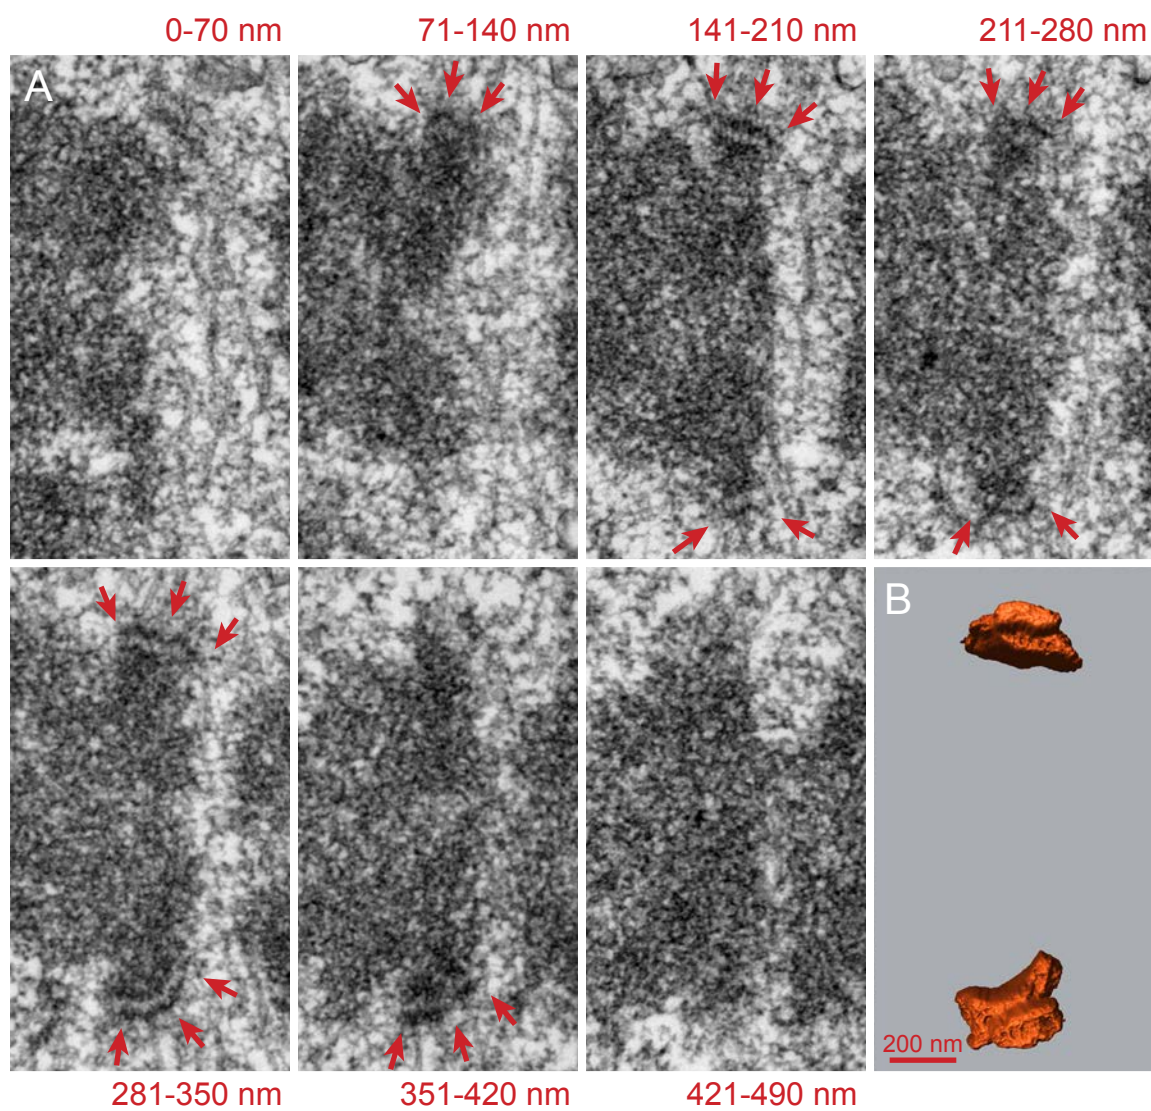

Figure 5 - figure supplement 1

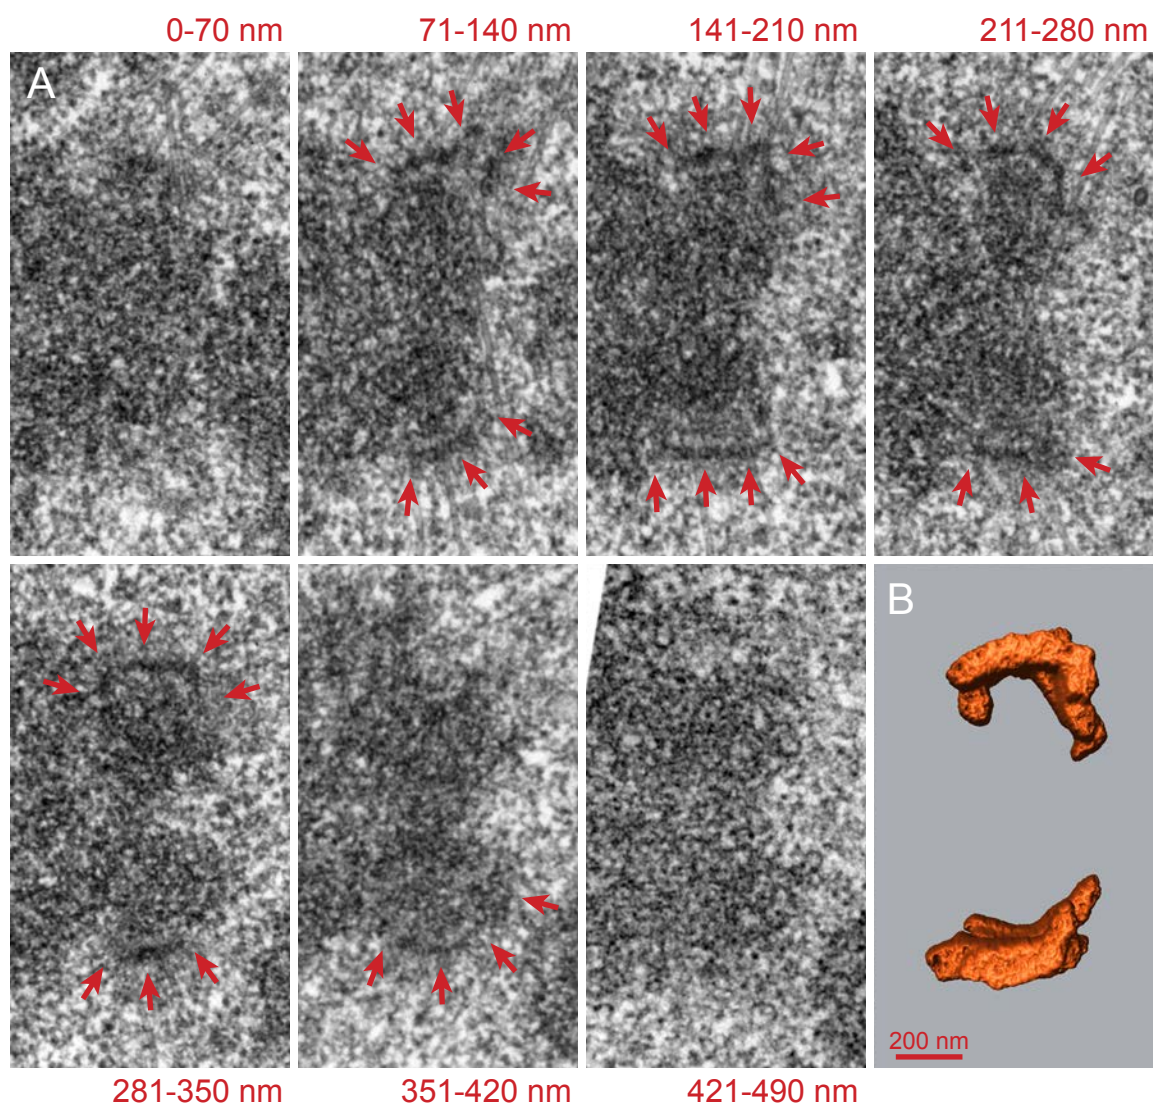

Figure 5 - figure supplement 2
